# Supplementary material for: Elderly patients with cancer admitted to intensive care unit: A multicenter study in a middle-income country
Source: PLoS One. 2020 Aug 21;15(8):e0238124. doi: 10.1371/journal.pone.0238124 (PMC7442258; doi:10.1371/journal.pone.0238124)
Supplement: S1 Data — (XLSX) [file pone.0238124.s003.xlsx]

## Sheet: data_plosone
Cod_ICU	Age	Sex	ICU_Outcome	ICU_LOS	Hospital_Outcome	Hospital_LOS	AdmissionType	Admission_reason	Cancer_type	Solid_site	Hematological_Type	MV	Vasopressors	RRT	Charlson	SAPS3	PS
71	83	0	0	4	0	15	3	1	1		3	0	0	0	2	58
72	87	0	1	4	1	4	1	2	2			0	0	0	0	72
48	87	1	1	8	1	8	1	2	2		1	0	0	0	2	70	1
46	86	1	1	8	1	8	1	2	2			0	1	0	2	71	1
12	85	0	0	4	0	14	1	2	2		2	0	0	0	2	64	1
8	83	1	0	1	1	9	1	2	2		2	0	0	0	2	70	1
97	94	1	0	8	0	21	1	2	1			0	0	0	2	70	1
91	87	1	0	22	1	99	1	2	1		2	1	1	0	2	89	1
19	90	1	0	1	0	8	1	2	1		2	0	1	0	2	57	1
19	88	1	0	7	1	52	1	2	1		3	0	0	0	1	58	1
98	82	1	0	1	0	2	1	3	2			0	0	0	9	65	1
59	84	0	0	27	0	27	1	4	2		3	1	0	0	2	64	1
34	81	1	1	6	1	7	1	4	2		1	1	0	0	2	81	1
24	85	0	1	1	1	36	1	4	2		3	0	1	0	2	92	1
98	80	1	0	4	0	4	1	4	1			1	0	0	5	73	0
97	89	1	1	2	1	5	1	4	1			0	0	0	0	78	1
90	87	1	0	20	1	99	1	4	1		2	0	1	0	2	72	1
18	91	0	0	2	0	17	1	5	2		3	1	0	0	2	81	1
31	82	1	0	9	0	11	1	7	2		3	1	0	0	2	79	1
28	85	0	0	11	1	36	1	7	2		3	0	1	0	2	84	1
92	87	1	1	24	1	99	1	7	1		2	0	1	0	2	68	1
48	91	0	0	6	1	35	1	9	2		1	0	0	0	2	64	1
15	80	1	0	11	1	23	1	9	2		3	0	1	0	2	89	1
27	87	0	1	3	1	15	1	9	1		1	1	0	0	2	82	1
12	81	1	0	7	1	25	1	9	1		3	0	0	0	2	63	0
98	89	1	0	4	1	13	3	1	3	0	2	1	1	0	6	104	1
82	90	1	0	4	0	21	3	1	3	0	1	0	0	0	1	54	0
74	92	0	1	5	1	6	3	1	3	0	1	0	0	0	2	71	1
71	82	0	1	20	1	25	3	1	3	0	3	0	1	0	1	64
50	81	1	1	4	1	15	3	1	3	0	2	0	1	0	1	72	1
29	83	0	0	1	0	8	3	1	3	0		0	0	1	2	60	0
23	86	1	0	4	1	92	3	1	3	0	99	1	0	0	0	76	1
21	82	1	0	1	0	11	3	1	3	0	1	0	0	1	2	57
21	81	0	0	1	0	21	3	1	3	0	3	0	0	0	1	24	0
21	82	1	1	1	1	3	3	1	3	0	3	0	1	0	2	82	0
21	89	0	0	4	1	12	3	1	3	0	3	0	0	0	0	28	0
19	87	1	0	32	1	71	3	1	3	0	2	1	0	0	1	45	1
98	92	0	0	2	0	17	1	2	3	0	3	0	1	0	7	77	1
98	82	1	0	4	0	4	1	2	3	0	99	0	0	0	7	84	0
98	87	0	0	2	0	7	1	2	3	0		0	0	0	7	72	1
98	85	0	0	0	0	18	1	2	3	0	2	0	1	0	6	78	0
98	88	0	0	6	0	6	1	2	3	0	1	1	0	0	8	89	1
98	82	0	0	1	0	16	1	2	3	0		0	0	0	2	61	0
98	88	0	0	3	0	10	1	2	3	0		0	0	0	9	82	1
98	88	1	0	12	0	18	1	2	3	0	3	0	0	0	7	84	1
98	84	0	0	5	0	10	1	2	3	0		1	1	0	7	96	1
98	82	0	0	2	0	63	1	2	3	0	3	0	1	0	6	90	1
98	81	0	0	3	0	5	1	2	3	0	2	0	0	0	7	90	0
98	82	0	1	1	1	1	1	2	3	0	3	1	1	0	6	100	1
98	82	0	0	1	1	14	1	2	3	0		0	0	0	9	72	1
98	83	1	0	3	1	4	1	2	3	0		0	0	0	12	81	0
98	83	1	1	13	1	13	1	2	3	0	3	0	1	0	6	99	0
98	80	0	1	1	1	1	1	2	3	0		0	1	0	6	132	0
98	86	0	1	2	1	19	1	2	3	0	1	0	1	0	9	95	1
98	81	1	1	1	1	1	1	2	3	0		0	1	0	12	112	1
98	81	0	1	1	1	1	1	2	3	0	3	1	0	0	6	73	0
98	80	1	0	6	1	35	1	2	3	0		0	1	1	7	105	1
98	83	1	1	5	1	5	1	2	3	0		0	1	0	6	129	0
98	85	1	0	1	1	10	1	2	3	0	3	0	0	0	6	78	0
98	81	0	0	4	1	11	1	2	3	0	2	0	1	0	7	107	1
97	80	1	1	1	1	2	1	2	3	0	3	0	1	0	1	82	0
95	80	1	0	1	0	11	1	2	3	0	1	0	0	0	2	65	0
95	81	0	0	2	1	6	1	2	3	0	2	0	0	0	1	56	1
90	87	0	0	4	0	12	1	2	3	0	2	0	0	0	1	62	0
90	82	1	0	6	0	14	1	2	3	0	3	0	0	0	1	56	0
90	89	0	1	3	1	3	1	2	3	0	3	0	1	0	1	62	1
90	84	0	1	8	1	8	1	2	3	0	3	0	0	0	2	71	1
91	80	1	0	42	1	63	1	2	3	0	3	0	0	1	2	76	1
84	83	1	0	8	0	14	1	2	3	0	1	1	1	0	1	69	0
85	84	0	0	5	0	41	1	2	3	0	3	0	0	0	2	66	1
86	90	0	0	8	0	13	1	2	3	0	1	1	1	0	2	74	1
86	84	0	0	11	0	11	1	2	3	0	2	0	0	0	2	69	1
85	83	1	1	3	1	13	1	2	3	0	2	0	1	1	1	86	0
85	84	0	0	8	1	40	1	2	3	0	3	0	1	0	2	71	0
85	84	1	0	2	1	7	1	2	3	0	1	1	0	0	1	56	1
78	83	1	0	2	0	15	1	2	3	0	99	0	0	0	1	62	0
78	88	1	1	2	1	2	1	2	3	0	99	0	0	0	2	75	0
78	92	0	0	1	1	29	1	2	3	0	1	0	0	0	2	66	1
78	90	1	1	7	1	7	1	2	3	0	3	0	0	0	1	64	1
77	87	0	0	6	0	10	1	2	3	0	3	0	0	0	1	61	0
77	86	1	0	16	1	22	1	2	3	0	3	0	0	0	2	69	1
77	84	0	1	43	1	43	1	2	3	0	2	0	0	0	1	70	1
75	82	0	0	4	1	39	1	2	3	0		0	0	0	2	81	0
75	83	0	1	6	1	9	1	2	3	0	3	0	1	0	2	83	1
75	84	1	0	14	1	16	1	2	3	0	3	0	1	0	1	74	1
74	81	1	0	5	0	47	1	2	3	0	3	0	1	0	1	88	0
71	81	0	0	5	0	9	1	2	3	0	3	0	0	0	1	56
71	81	0	0	1	0	13	1	2	3	0	3	1	0	0	0	63
71	80	0	0	3	0	32	1	2	3	0	1	0	0	0	1	61
71	81	0	0	3	0	5	1	2	3	0	1	0	0	0	1	58
72	80	0	0	1	0	32	1	2	3	0	1	1	0	0	0	72
72	80	0	0	3	0	8	1	2	3	0	1	0	0	0	1	73
71	88	0	0	13	1	20	1	2	3	0	3	1	1	0	1	75
71	89	0	1	2	1	3	1	2	3	0	2	1	1	0	1	98
66	87	0	0	3	0	7	1	2	3	0	3	0	0	0	1	56	0
66	91	1	0	1	1	33	1	2	3	0	3	0	0	0	2	62	1
65	86	0	1	5	1	7	1	2	3	0	99	0	1	0	2	96	1
59	80	1	1	6	1	6	1	2	3	0	3	0	1	0	1	81	1
55	86	0	0	7	0	9	1	2	3	0	1	0	0	0	2	59	0
55	81	0	0	11	0	12	1	2	3	0	1	0	0	0	1	75	0
55	83	0	1	10	1	10	1	2	3	0	2	0	1	0	2	83	1
55	83	1	1	7	1	35	1	2	3	0	2	0	0	0	2	77	1
52	83	1	0	6	0	8	1	2	3	0	1	0	0	0	2	55	1
52	90	0	1	21	1	22	1	2	3	0	3	0	1	0	1	79	1
52	81	0	0	7	1	12	1	2	3	0	3	0	0	0	1	53	0
44	84	1	1	25	1	25	1	2	3	0	3	0	1	1	2	65	1
44	85	0	0	7	1	65	1	2	3	0	1	0	1	1	2	83	1
45	85	1	1	86	1	103	1	2	3	0	3	0	1	1	2	77	1
46	85	1	0	53	1	106	1	2	3	0	1	1	1	0	1	71	1
46	85	1	0	12	1	20	1	2	3	0	2	0	0	0	2	67	1
42	90	0	0	14	0	23	1	2	3	0	2	0	0	0	2	58	0
42	88	0	1	36	1	36	1	2	3	0	1	0	1	0	0	62	0
39	82	0	0	10	0	24	1	2	3	0	1	0	1	1	1	87	0
39	87	0	1	5	1	6	1	2	3	0	3	0	0	0	2	70	1
37	92	1	1	3	1	3	1	2	3	0	3	1	1	0	1	70	0
36	90	1	1	10	1	13	1	2	3	0		0	0	0	2	63	1
35	82	0	0	10	0	24	1	2	3	0	2	1	0	0	1	73	1
35	84	0	1	12	1	36	1	2	3	0	3	0	0	0	2	77	1
34	80	0	0	2	1	32	1	2	3	0	2	1	0	0	1	78	1
34	82	1	1	8	1	9	1	2	3	0	2	0	0	0	2	56	1
34	83	0	1	2	1	2	1	2	3	0	1	0	1	0	1	68	1
34	91	1	0	1	1	12	1	2	3	0	2	0	0	0	1	55	0
34	83	0	1	4	1	5	1	2	3	0	2	0	0	0	1	61	0
30	83	1	0	3	0	5	1	2	3	0	3	0	0	0	0	52	1
30	86	0	0	4	1	72	1	2	3	0	3	0	0	0	0	63	1
25	88	0	0	3	0	12	1	2	3	0	1	1	0	0	2	60	1
25	87	1	0	1	0	3	1	2	3	0	1	0	0	0	2	56	1
25	85	0	0	10	0	13	1	2	3	0	1	0	0	0	2	59	1
25	89	1	0	2	0	16	1	2	3	0	99	0	0	0	1	65	0
26	88	0	0	3	0	6	1	2	3	0	1	1	0	0	1	62	0
26	86	0	0	3	0	7	1	2	3	0	1	0	0	0	1	72	0
26	88	0	0	3	0	8	1	2	3	0	3	0	0	0	1	62	1
27	84	0	0	30	0	51	1	2	3	0	3	1	0	0	2	70	1
27	87	1	0	6	0	8	1	2	3	0	99	1	0	0	2	60	1
27	85	0	0	6	0	47	1	2	3	0	3	0	0	0	1	66	1
27	85	0	0	5	0	13	1	2	3	0	1	1	0	0	2	73	0
27	95	0	0	17	0	35	1	2	3	0	2	1	1	1	1	100	0
28	90	0	0	5	0	8	1	2	3	0		1	0	0	2	70	1
25	84	0	1	6	1	7	1	2	3	0	1	1	0	0	2	76	1
25	89	1	1	28	1	28	1	2	3	0	1	0	1	1	2	73	0
26	84	1	1	3	1	6	1	2	3	0	3	0	1	0	2	94	1
27	86	1	1	14	1	14	1	2	3	0	1	0	1	1	2	73	1
28	86	0	1	27	1	27	1	2	3	0	3	0	1	0	1	48	0
28	91	1	0	13	1	14	1	2	3	0	3	0	0	0	1	66	0
23	84	0	0	3	0	15	1	2	3	0	2	1	0	0	1	68	0
23	84	1	0	4	0	11	1	2	3	0	99	0	0	0	2	61	1
56	82	1	0	9	0	27	1	2	3	0	99	0	1	0	2	77	0
56	84	0	0	6	0	13	1	2	3	0	2	1	0	0	1	70	0
57	96	0	1	73	1	77	1	2	3	0	2	1	0	0	2	87	1
21	86	1	0	6	0	15	1	2	3	0	2	1	0	0	1	61
21	81	0	0	3	0	25	1	2	3	0	99	0	0	0	2	56	0
21	91	0	0	2	0	6	1	2	3	0	2	1	0	0	2	60	1
21	87	1	0	40	0	89	1	2	3	0	3	1	1	0	2	94	0
21	89	1	0	4	0	26	1	2	3	0	1	0	1	0	1	80	1
21	92	0	0	3	0	24	1	2	3	0	2	1	0	0	2	27	1
21	80	1	0	4	0	12	1	2	3	0	2	0	0	0	2	25	0
21	84	1	0	3	0	10	1	2	3	0	2	0	1	0	1	41	0
21	81	0	0	2	0	32	1	2	3	0	2	0	0	0	1	37	0
21	88	1	0	19	0	48	1	2	3	0	3	1	0	0	1	41	1
21	84	0	0	3	0	11	1	2	3	0	3	0	0	0	2	56	1
21	80	0	0	1	1	25	1	2	3	0	3	0	0	0	2	32	0
20	82	1	1	3	1	14	1	2	3	0	2	0	0	0	1	98	0
19	83	1	0	1	0	5	1	2	3	0	99	0	0	0	2	35	1
19	85	1	0	1	0	9	1	2	3	0	3	1	0	0	2	54	1
19	88	1	0	10	0	104	1	2	3	0	3	0	0	0	0	45	1
19	85	1	0	3	0	6	1	2	3	0	99	0	0	0	2	36	1
19	85	1	0	3	0	11	1	2	3	0	3	1	0	0	0	16	1
19	83	1	0	5	0	11	1	2	3	0	3	1	0	0	1	34	1
19	83	0	0	3	0	21	1	2	3	0	1	1	0	0	0	25	1
19	80	1	0	1	0	12	1	2	3	0	1	0	1	0	1	50	1
19	89	1	0	1	0	11	1	2	3	0	1	0	0	1	1	40	1
19	89	1	0	1	0	15	1	2	3	0	1	0	0	0	0	34	1
19	91	1	0	5	0	18	1	2	3	0	3	1	0	1	2	57	1
19	87	0	1	11	1	23	1	2	3	0	1	0	1	0	1	18	1
19	87	1	1	6	1	7	1	2	3	0	3	1	0	0	2	45	1
19	83	0	1	20	1	21	1	2	3	0	1	1	0	0	1	37	1
18	86	1	0	3	0	10	1	2	3	0	3	0	0	0	2	65	0
18	87	0	0	3	0	50	1	2	3	0	99	0	0	0	1	61	1
18	82	1	0	1	0	13	1	2	3	0	3	0	0	0	2	60	0
18	88	0	0	6	1	18	1	2	3	0	3	0	0	0	2	68	1
18	81	0	1	1	1	136	1	2	3	0	3	0	0	0	2	99	0
18	85	1	1	2	1	139	1	2	3	0	1	1	1	1	2	111	1
18	93	0	0	4	1	219	1	2	3	0	1	1	0	0	1	56	1
18	87	1	1	7	1	9	1	2	3	0	3	0	0	1	1	78	1
18	93	1	1	1	1	1	1	2	3	0	1	0	1	0	1	93	1
17	86	1	0	14	0	39	1	2	3	0	3	1	1	1	2	74	0
17	82	0	1	6	1	6	1	2	3	0	2	1	1	0	2	68	1
15	85	1	1	1	1	1	1	2	3	0	3	0	1	0	1	95	1
15	83	0	1	2	1	2	1	2	3	0	1	0	0	0	2	70	1
15	80	1	1	3	1	10	1	2	3	0	3	0	0	0	1	93	1
15	84	1	1	1	1	4	1	2	3	0	1	0	0	0	2	117	1
15	84	1	1	1	1	1	1	2	3	0	1	0	1	0	1	105	1
8	88	1	0	2	0	6	1	2	3	0	1	0	0	0	2	58	0
8	91	0	0	2	0	7	1	2	3	0	3	0	0	0	2	58	1
9	80	0	0	7	0	16	1	2	3	0	1	1	0	0	2	69	1
11	91	0	0	1	0	2	1	2	3	0	3	0	0	0	1	53	0
10	86	1	0	13	1	17	1	2	3	0	3	0	1	0	1	63	1
11	84	0	1	8	1	15	1	2	3	0	2	0	1	1	1	58	0
12	95	1	0	16	1	24	1	2	3	0	3	0	0	0	2	77	1
4	89	0	1	1	1	1	1	2	3	0	2	0	1	0	1	95	1
98	81	1	0	1	0	2	3	3	3	0		0	0	0	4	51	0
98	81	0	0	2	0	8	1	3	3	0	3	0	0	0	6	95	0
98	82	1	0	2	0	13	1	3	3	0	3	0	0	0	6	77	0
98	83	0	0	2	0	17	1	3	3	0	1	0	0	0	10	82	1
98	83	0	0	1	0	6	1	3	3	0	1	1	0	0	9	67	1
98	84	1	0	4	0	21	1	3	3	0	1	1	1	0	9	81	1
98	81	1	0	1	0	8	1	3	3	0	3	0	1	0	8	72	0
98	80	1	0	4	0	5	1	3	3	0	1	0	0	0	6	78	0
98	86	1	0	4	0	5	1	3	3	0	3	0	1	0	6	61	1
98	86	0	0	2	0	16	1	3	3	0		1	0	0	7	79	0
98	84	0	0	3	0	4	1	3	3	0	3	0	0	0	6	83	0
98	83	0	0	1	0	4	1	3	3	0	3	0	0	0	6	70	0
98	88	0	0	3	0	7	1	3	3	0		0	0	0	6	72	1
98	82	1	0	3	0	7	1	3	3	0	1	0	0	0	7	70	1
98	83	0	1	10	1	10	1	3	3	0	3	0	1	0	9	90	1
98	92	0	0	4	1	34	1	3	3	0	3	0	0	0	6	119	1
98	89	0	1	1	1	1	1	3	3	0	3	0	1	0	7	136	0
92	81	0	0	2	0	8	1	3	3	0	3	0	0	0	1	55	0
87	84	1	0	5	1	9	1	3	3	0	2	1	0	0	1	70	0
84	87	0	0	7	1	39	1	3	3	0	3	0	0	0	2	57	1
85	87	0	1	13	1	39	1	3	3	0	3	1	0	0	2	67	1
78	90	1	1	6	1	7	1	3	3	0	2	0	0	0	2	67	1
78	89	0	1	25	1	29	1	3	3	0	99	0	1	0	2	67	1
70	81	0	0	9	0	10	1	3	3	0	1	0	0	0	1	55
72	81	0	0	2	0	11	1	3	3	0	1	0	0	0	1	53
66	88	0	0	5	1	17	1	3	3	0	3	0	0	0	2	53	0
55	87	0	0	1	0	1	1	3	3	0	1	0	0	0	1	48	0
52	87	0	0	10	0	12	1	3	3	0	3	0	0	0	1	53	1
52	80	0	0	9	0	17	1	3	3	0	1	0	0	1	1	61	1
53	83	1	0	1	0	7	1	3	3	0	2	1	0	0	2	52	0
52	88	0	1	74	1	74	1	3	3	0	1	1	1	1	1	64	1
52	84	0	1	14	1	23	1	3	3	0	1	1	1	0	1	85	1
48	83	1	0	2	0	2	1	3	3	0	3	0	0	0	1	53	0
48	83	0	0	6	0	7	1	3	3	0	3	0	0	0	1	53	0
25	83	0	0	3	0	8	1	3	3	0		0	0	1	2	61	0
28	90	0	0	6	0	10	1	3	3	0	99	1	0	0	2	60	1
25	87	0	0	1	1	2	1	3	3	0	2	0	0	0	1	66	1
23	86	1	0	4	0	72	1	3	3	0	3	1	0	0	0	49	1
56	82	0	0	1	0	6	1	3	3	0	2	0	0	0	2	58	1
23	92	1	1	4	1	4	1	3	3	0	1	1	1	1	2	50	1
19	80	1	0	14	1	57	1	3	3	0	1	1	0	0	1	56	1
18	86	1	0	1	0	3	1	3	3	0	3	0	0	0	2	55	0
18	87	1	0	2	0	8	1	3	3	0	2	1	0	0	2	58	1
18	85	1	0	4	0	25	1	3	3	0	1	0	0	0	2	65	1
18	84	0	1	16	1	17	1	3	3	0	2	1	1	0	2	60	0
12	82	0	0	3	1	28	1	3	3	0	2	0	0	0	2	70	0
4	94	0	0	5	0	16	1	3	3	0	3	0	0	0	2	63	1
98	84	1	0	1	0	19	3	4	3	0	3	1	0	0	8	75	1
98	80	0	0	2	0	9	1	4	3	0	2	0	0	0	6	49	1
98	83	0	0	6	0	14	1	4	3	0	1	0	0	0	9	86	1
98	82	1	0	4	0	14	1	4	3	0	2	1	0	0	6	91	1
98	83	0	0	5	0	8	1	4	3	0	1	0	0	0	9	70	1
98	84	0	0	1	0	2	1	4	3	0	1	1	0	0	6	71	0
98	88	0	0	5	0	37	1	4	3	0	3	1	0	0	6	66	0
98	88	0	0	18	0	18	1	4	3	0	99	1	0	0	7	81	1
98	86	0	0	3	0	43	1	4	3	0	3	1	1	0	7	80	1
98	90	0	0	1	0	2	1	4	3	0	3	0	0	0	7	81	0
98	87	0	0	3	0	7	1	4	3	0		0	0	0	6	101	0
98	80	0	0	4	0	5	1	4	3	0		0	0	0	7	72	0
98	80	0	0	2	0	10	1	4	3	0		0	0	0	7	95	1
98	83	0	1	1	1	1	1	4	3	0	3	1	1	0	6	73	0
98	91	0	1	3	1	2	1	4	3	0		1	0	0	6	77	1
98	89	1	0	3	1	11	1	4	3	0	1	1	0	0	7	93	0
98	92	1	0	6	1	10	1	4	3	0	1	1	1	0	6	98	0
98	84	1	1	10	1	10	1	4	3	0	3	1	0	0	7	72	1
98	81	1	0	4	1	11	1	4	3	0	2	1	0	0	7	94	1
98	81	1	1	1	1	3	1	4	3	0	3	0	1	0	7	76	1
98	80	0	1	7	1	1	1	4	3	0		0	0	1	7	88	1
98	80	1	0	4	1	13	1	4	3	0		1	0	1	8	98	0
98	93	1	1	19	1	19	1	4	3	0	3	0	1	1	6	117	1
98	80	1	0	7	1	26	1	4	3	0		0	1	1	9	114	1
98	80	0	0	2	1	9	1	4	3	0		1	0	1	9	101	1
98	88	0	1	0	1	0	1	4	3	0	99	0	1	0	6	103	1
98	84	1	0	1	1	8	1	4	3	0		0	0	0	6	54	0
97	84	0	0	3	0	19	1	4	3	0	3	1	0	0	2	69	0
97	82	1	0	3	1	20	1	4	3	0	1	1	0	0	2	64	0
90	81	0	1	42	1	49	1	4	3	0	2	0	1	1	2	64	0
86	84	0	0	34	0	37	1	4	3	0	2	1	0	0	2	68	1
82	81	0	1	26	1	32	1	4	3	0	2	0	0	0	1	79	1
74	92	0	0	13	0	32	1	4	3	0	1	0	0	0	1	62	1
74	80	0	1	9	1	10	1	4	3	0	3	0	0	0	2	62	0
71	84	0	1	12	1	12	1	4	3	0	2	0	0	0	1	73
62	86	0	1	1	1	1	1	4	3	0	99	0	1	0	1	83	1
55	90	0	0	1	0	9	1	4	3	0	99	0	0	0	2	53	0
45	85	1	1	53	1	106	1	4	3	0	1	0	1	0	1	74	1
46	87	0	1	17	1	17	1	4	3	0	3	0	1	0	1	75	1
34	82	0	1	16	1	17	1	4	3	0	2	1	0	0	2	70	1
21	86	1	0	2	0	5	1	4	3	0	3	1	0	0	0	60
21	86	1	0	1	0	4	1	4	3	0	3	0	0	0	1	33	0
20	83	0	1	40	1	55	1	4	3	0	3	0	0	0	1	69	0
20	83	0	1	12	1	12	1	4	3	0	2	0	0	0	1	73	0
19	96	0	0	2	1	18	1	4	3	0	99	1	0	0	0	39	1
19	82	0	1	1	1	1	1	4	3	0	3	0	0	0	1	29	1
18	92	1	0	8	1	34	1	4	3	0	3	1	1	0	2	65	1
9	81	1	1	8	1	8	1	4	3	0	3	1	1	0	1	64	0
10	89	1	1	1	1	1	1	4	3	0	1	0	0	0	1	100	1
98	84	0	0	2	0	24	1	5	3	0		0	0	0	7	74	1
98	88	0	0	4	0	11	1	5	3	0		0	0	0	6	83	1
98	89	0	0	2	0	17	1	5	3	0		0	0	0	6	67	1
98	82	1	0	12	1	19	1	5	3	0	1	0	0	0	6	113	1
98	82	0	1	12	1	12	1	5	3	0		0	0	0	9	89	1
95	83	1	0	1	0	56	1	5	3	0	1	0	0	0	2	71	1
95	84	1	0	1	0	3	1	5	3	0	2	0	0	0	1	56	0
86	83	1	1	27	1	51	1	5	3	0	3	1	1	0	2	69	1
78	86	0	0	1	0	5	1	5	3	0	3	0	0	0	2	65	0
78	90	0	1	11	1	15	1	5	3	0	3	0	1	1	2	64	1
77	87	0	0	4	0	9	1	5	3	0	3	0	0	0	1	65	0
72	88	0	1	1	1	20	1	5	3	0	3	0	1	0	1	113
66	87	1	0	3	0	8	1	5	3	0	1	0	0	0	1	49	0
65	92	0	0	15	1	66	1	5	3	0		1	0	0	2	73	1
55	85	0	0	14	1	25	1	5	3	0	3	0	1	0	1	71	1
44	85	1	0	17	1	103	1	5	3	0	3	0	1	0	2	55	1
46	85	0	0	22	1	65	1	5	3	0	1	0	1	1	2	57	1
34	80	0	0	4	0	59	1	5	3	0	2	0	0	0	1	60	1
24	92	0	0	5	0	5	1	5	3	0	3	1	0	0	2	60	1
26	90	1	0	2	0	6	1	5	3	0	2	0	0	0	1	68	0
21	86	0	0	1	0	17	1	5	3	0	3	0	0	0	1	54	0
19	91	1	0	2	0	19	1	5	3	0	3	0	0	1	1	51	1
19	84	1	0	3	1	27	1	5	3	0	1	0	0	0	1	44	1
18	92	1	0	3	0	10	1	5	3	0	1	0	0	0	1	72	0
17	87	0	0	4	0	9	1	5	3	0	1	0	0	0	1	64	0
8	84	1	0	5	0	8	1	5	3	0	1	0	0	0	1	62	1
12	86	1	1	2	1	2	1	5	3	0	2	0	0	0	2	90	1
13	84	1	0	2	1	34	1	5	3	0	3	0	0	0	2	57	0
98	86	0	0	1	0	5	1	6	3	0		0	0	0	6	64	0
98	84	0	0	6	1	15	1	6	3	0	1	0	0	1	8	91	1
98	82	0	1	7	1	7	1	6	3	0	1	1	0	1	9	80	0
98	83	0	1	1	1	1	1	6	3	0		0	0	0	6	80	1
98	82	0	0	10	1	18	1	6	3	0	3	1	0	1	7	75	1
95	83	0	0	1	1	8	1	6	3	0	3	0	0	0	2	85	0
91	87	0	0	4	0	12	1	6	3	0	2	0	0	0	1	56	0
91	87	0	0	23	1	60	1	6	3	0	2	0	0	0	1	68	0
88	92	0	1	14	1	14	1	6	3	0		0	0	0	2	77	0
86	84	0	0	6	0	15	1	6	3	0	3	0	0	0	2	69	1
71	85	0	0	1	1	25	1	6	3	0	1	0	0	0	0	58
72	85	0	1	25	1	25	1	6	3	0	1	1	0	0	1	58
66	81	1	1	6	1	7	1	6	3	0	2	0	1	1	2	66	1
55	95	0	0	7	0	7	1	6	3	0	3	0	0	0	2	50	0
48	89	0	1	24	1	27	1	6	3	0	3	0	1	0	2	60	0
45	85	0	0	5	1	65	1	6	3	0	1	0	1	1	2	81	1
34	84	0	0	4	0	9	1	6	3	0	1	0	0	0	2	67	0
27	82	0	0	2	0	3	1	6	3	0	2	0	0	1	2	66	1
27	84	1	0	1	0	11	1	6	3	0	1	0	0	0	2	60	1
27	83	1	0	1	0	20	1	6	3	0	3	0	0	0	2	55	1
56	80	0	0	2	0	5	1	6	3	0	1	0	0	0	2	63	1
21	85	0	0	1	0	13	1	6	3	0	3	0	0	0	1	60	0
18	83	0	0	3	1	54	1	6	3	0	3	1	1	1	2	68	1
12	82	0	0	4	0	12	1	6	3	0	1	0	0	0	2	61	1
98	86	0	1	6	1	6	1	7	3	0	2	0	0	0	7	80	1
98	82	1	1	34	1	34	1	7	3	0	2	1	0	1	8	95	0
98	86	0	0	3	1	17	1	7	3	0		0	0	0	6	85	0
98	86	0	1	0	1	10	1	7	3	0		0	0	0	6	119	1
82	81	1	1	7	1	7	1	7	3	0	1	0	0	0	1	63	0
77	81	1	0	3	0	7	1	7	3	0	2	0	0	0	2	66	0
70	80	0	0	1	0	32	1	7	3	0	1	0	0	0	1	56
71	83	0	0	4	0	5	1	7	3	0	2	0	0	0	1	58
66	84	0	0	4	0	7	1	7	3	0	1	0	0	0	2	72	0
66	84	0	0	1	0	5	1	7	3	0	2	0	0	0	1	56	0
54	82	0	0	14	0	17	1	7	3	0	2	0	0	0	2	64	0
51	81	0	1	13	1	13	1	7	3	0	1	1	0	0	2	63	1
39	80	0	0	7	1	41	1	7	3	0	1	0	0	0	1	61	1
25	85	1	0	16	0	28	1	7	3	0	3	0	0	0	2	58	0
26	94	1	0	4	0	4	1	7	3	0	2	0	0	0	2	53	0
28	87	0	0	3	0	7	1	7	3	0	3	0	0	0	1	53	0
25	98	0	0	4	1	7	1	7	3	0	3	0	0	0	1	55	1
28	98	0	1	2	1	7	1	7	3	0	3	0	1	0	1	63	1
23	84	0	0	3	0	10	1	7	3	0	2	0	0	0	1	66	1
19	89	1	0	2	0	8	1	7	3	0	3	0	0	1	2	33	1
19	80	1	0	2	0	7	1	7	3	0	2	0	1	0	1	57	1
17	81	0	0	3	0	4	1	7	3	0	3	0	0	0	2	66	0
11	94	1	0	6	0	18	1	7	3	0	3	0	0	0	1	63	1
11	84	1	0	3	0	7	1	7	3	0	3	0	0	0	2	63	0
12	81	1	0	1	0	4	1	7	3	0	3	0	0	0	1	63	0
11	80	0	0	41	1	60	1	7	3	0	99	1	0	1	2	62	1
12	81	1	1	15	1	15	1	7	3	0	1	1	1	1	2	71	0
98	85	1	0	1	0	7	1	9	3	0	3	0	0	0	8	64	1
98	80	1	0	7	0	8	1	9	3	0		0	0	0	8	87	1
98	90	0	0	1	0	131	1	9	3	0		0	0	0	2	48	1
98	84	0	0	2	0	25	1	9	3	0	3	0	0	0	6	87	0
98	80	0	0	5	0	7	1	9	3	0		0	0	0	7	72	1
98	85	1	0	3	0	17	1	9	3	0	3	0	0	0	6	67	1
98	90	0	1	0	1	0	1	9	3	0	3	0	1	0	7	94	0
98	80	0	0	16	1	55	1	9	3	0		1	1	1	7	84	1
98	87	1	0	0	1	79	1	9	3	0		1	0	0	7	96	1
98	82	0	0	4	0	10	1	9	3	0		0	0	0	2	63	1
95	84	1	0	5	0	13	1	9	3	0	2	0	0	0	2	74	0
95	84	1	0	3	0	5	1	9	3	0	2	0	0	0	1	57	0
90	85	1	0	6	0	12	1	9	3	0	2	0	0	0	2	82	1
88	82	0	1	2	1	2	1	9	3	0	2	0	0	0	1	82	1
85	92	1	0	15	0	16	1	9	3	0	2	1	1	0	2	58	1
82	80	0	0	2	0	5	1	9	3	0	3	0	0	0	2	58	0
78	91	0	0	1	0	4	1	9	3	0	1	0	0	0	2	59	1
78	84	0	0	4	0	147	1	9	3	0	1	0	0	0	2	59	1
74	81	1	1	23	1	30	1	9	3	0	2	0	0	0	2	96	0
72	81	0	0	4	0	13	1	9	3	0	3	1	0	0	0	67
72	81	0	0	3	0	6	1	9	3	0	1	0	0	0	1	62
71	88	0	0	16	1	18	1	9	3	0	99	0	1	0	1	80
72	88	0	1	2	1	18	1	9	3	0	99	0	1	0	1	72
55	88	0	0	1	0	48	1	9	3	0	3	0	0	0	1	58	0
55	82	1	0	2	0	15	1	9	3	0	2	0	0	0	2	68	0
52	83	0	0	1	0	2	1	9	3	0	1	0	0	0	1	55	1
51	83	1	0	4	0	17	1	9	3	0	99	0	0	0	1	68	1
44	87	1	1	3	1	17	1	9	3	0	2	0	0	0	2	85	1
37	83	0	1	5	1	5	1	9	3	0	1	0	0	0	2	71	1
35	83	1	0	2	0	7	1	9	3	0	2	0	1	0	1	61	1
31	80	0	1	15	1	27	1	9	3	0	1	1	1	1	2	69	1
30	82	0	0	6	1	13	1	9	3	0	1	0	0	1	0	53	1
24	87	1	0	1	0	1	1	9	3	0	1	0	0	0	2	47	0
26	86	1	0	1	0	3	1	9	3	0	3	0	0	0	2	60	0
24	84	1	0	1	1	6	1	9	3	0	3	0	1	0	2	64	1
26	89	0	0	5	1	34	1	9	3	0	2	0	0	0	1	57	0
26	86	0	1	22	1	26	1	9	3	0	1	0	0	1	2	62	0
27	81	0	1	7	1	8	1	9	3	0	3	0	0	0	2	66	1
28	87	0	1	7	1	7	1	9	3	0	2	0	0	0	2	71	1
23	86	1	1	9	1	9	1	9	3	0	3	1	1	1	1	61	1
21	82	0	0	2	0	7	1	9	3	0	3	0	0	0	2	53	0
21	85	0	0	5	0	20	1	9	3	0	3	1	1	0	1	82	0
21	84	0	0	13	0	73	1	9	3	0	3	1	0	0	1	33	0
21	89	1	1	2	1	2	1	9	3	0	1	0	0	0	1	37	1
20	85	0	0	7	0	28	1	9	3	0	2				1	56	0
20	84	1	0	2	0	6	1	9	3	0	99				1	53	0
20	85	0	1	17	1	17	1	9	3	0	2	0	0	0	1	78	0
20	82	1	1	1	1	42	1	9	3	0	2				1	63	0
20	94	0	1	17	1	17	1	9	3	0	2				1	53	0
20	82	0	1	5	1	8	1	9	3	0	2				1	56	0
20	84	1	0	2	1	11	1	9	3	0	2	0	0	0	1	88	0
19	83	0	0	3	0	29	1	9	3	0	3	0	1	1	0	47	1
19	80	1	0	7	0	31	1	9	3	0	2	1	0	0	0	21	1
18	82	0	0	3	0	37	1	9	3	0	3	0	0	0	2	56	1
18	88	1	0	18	0	25	1	9	3	0	1	0	1	0	2	64	1
16	84	1	0	2	0	2	1	9	3	0	3	0	0	0	2	53	0
8	86	1	0	5	0	11	1	9	3	0	1	0	0	0	1	67	1
8	87	1	0	1	0	11	1	9	3	0	2	0	0	0	1	68	0
9	85	1	0	18	1	19	1	9	3	0	1	1	1	1	2	97	1
10	80	1	1	1	1	23	1	9	3	0	3	0	1	0	1	69	1
10	81	0	0	12	1	29	1	9	3	0	3	0	0	1	1	51	1
11	90	0	0	1	1	10	1	9	3	0	99	1	0	0	1	69	1
12	84	1	1	9	1	34	1	9	3	0	3	0	1	1	2	84	0
12	83	0	1	8	1	19	1	9	3	0	3	0	0	0	1	63	1
12	85	1	0	11	1	22	1	9	3	0	3	0	0	0	1	67	1
12	91	0	1	2	1	3	1	9	3	0	3	0	0	0	2	62	0
12	90	0	0	3	1	10	1	9	3	0	99	1	0	0	2	74	1
13	92	0	0	3	1	23	1	9	3	0	3	0	0	0	2	48	1
98	80	1	0	1	0	3	3	1	1	1		0	0	0	4	53	0
98	83	1	0	13	0	17	3	1	1	1		1	0	1	6	58	1
98	83	1	0	1	0	4	3	1	2	1		0	0	0	4	50	1
98	80	1	0	0	0	3	3	1	1	1		0	0	0	4	59	0
98	97	1	0	0	1	17	3	1	1	1		0	0	0	2	72	1
98	81	1	0	10	1	18	1	2	2	1		0	0	0	5	75	0
98	82	1	1	1	1	1	1	2	2	1		0	1	0	3	122	1
98	82	0	0	1	0	4	1	2	1	1		0	1	0	2	48	1
98	81	1	0	4	0	20	1	2	1	1		0	1	0	3	79	0
98	100	0	0	1	0	15	1	2	1	1		0	0	0	2	63	0
98	94	0	0	5	1	8	1	2	1	1		0	1	0	2	83	0
98	82	0	0	5	1	8	1	2	1	1		1	1	1	4	69	0
98	82	1	0	7	1	54	1	3	2	1		0	0	0	2	67	1
98	95	0	0	6	0	8	1	3	1	1		0	0	0	4	71	1
98	82	1	0	1	0	20	1	3	1	1		0	0	0	4	71	1
98	85	1	0	2	0	4	1	3	1	1		0	0	0	3	55	0
98	90	0	1	2	1	20	1	3	1	1		0	0	0	3	50	1
98	94	0	0	2	1	2	1	3	1	1		0	0	0	2	51	1
98	81	1	1	0	1	0	1	4	2	1		1	0	0	6	104	0
98	82	1	1	0	1	0	1	4	2	1		1	0	0	6	95	1
98	87	1	1	3	1	3	1	4	2	1		1	0	0	2	81	1
98	91	0	1	1	1	1	1	4	2	1		1	0	0	2	89	1
98	82	1	0	0	0	9	1	4	1	1		0	0	0	3	73	1
98	80	0	0	1	0	4	1	4	1	1		0	1	0	3	55	0
98	90	1	0	0	0	31	1	4	1	1		1	0	0	4	76	1
98	90	1	0	3	0	5	1	4	1	1		0	0	0	4	60	0
98	86	1	0	3	1	36	1	4	1	1		1	0	0	5	111	1
98	85	1	0	2	0	15	3	5	2	1		0	0	0	3	48	1
98	89	1	0	0	0	0	1	5	2	1		0	0	0	2	86	1
98	90	1	0	2	1	10	1	5	2	1		0	0	0	2	61	1
98	81	1	0	1	1	28	1	5	2	1		0	0	0	5	63	1
98	88	1	0	9	0	10	1	5	1	1		0	0	0	3	76	0
98	85	1	0	4	0	22	1	6	2	1		0	0	1	4	69	1
98	87	1	0	3	1	36	3	6	2	1		0	0	0	4	67	1
98	84	1	1	4	1	4	1	6	2	1		0	0	0	4	72	1
98	92	1	0	2	1	3	1	6	2	1		0	0	0	4	69	1
98	86	1	0	2	0	10	1	6	1	1		0	0	0	2	71	1
98	81	1	0	0	0	8	1	9	2	1		0	0	0	6	75	1
98	86	1	0	3	0	3	1	9	1	1		0	0	0	2	79	1
98	81	1	0	3	0	28	3	1	1	2		0	0	0	3	84	1
98	81	1	0	5	0	38	3	1	1	2		0	0	0	3	50	1
98	81	1	1	4	1	4	1	4	2	2		1	1	0	2	90	0
98	83	1	0	1	0	10	3	1	2	4		0	0	0	6	59	1
98	81	1	0	0	0	16	3	1	1	4		0	1	0	4	74	1
98	88	1	0	2	0	6	3	1	1	4		0	0	0	3	48	1
98	91	0	0	2	0	7	3	1	1	4		0	0	0	2	53	1
98	91	1	0	2	0	31	3	1	1	4		0	0	0	3	48	1
98	86	0	0	1	0	9	3	1	1	4		0	0	0	2	58	0
98	82	1	0	2	0	8	3	1	2	4		0	0	0	2	69	1
98	86	1	0	16	1	78	3	1	2	4		0	0	0	2	66	1
53	89	0	0	6	1	55	3	1	2	4		0	0	0	1	62	1
98	85	1	0	4	0	45	3	1	1	4		0	1	0	2	55	1
98	80	1	0	3	0	6	3	1	1	4		0	0	0	2	62	1
92	84	1	0	23	1	35	3	1	1	4		0	0	0	2	49	0
92	89	1	0	4	0	38	3	1	1	4		0	0	0	1	57	0
81	86	1	1	1	1	6	3	1	1	4		0	0	0	1	95	0
77	99	0	0	2	0	14	3	1	1	4		1	0	0	1	44	0
65	81	1	0	1	1	83	3	1	1	4		1	0	0	2	65	1
22	85	0	0	6	0	10	3	1	1	4		0	0	0	0	36	0
20	92	0	0	2	1	15	3	1	1	4		0	0	0	2	55	0
3	85	0	0	2	0	6	3	1	1	4		0	0	0	2	46	0
98	81	1	0	3	1	9	1	2	2	4		1	0	0	2	54	1
98	86	0	1	2	1	3	1	2	2	4		0	1	0	3	75	0
98	88	1	1	0	1	0	1	2	2	4		1	1	0	3	112	1
98	82	1	1	2	1	63	1	2	2	4		0	1	1	2	61	0
90	92	1	1	19	1	20	1	2	2	4		1	1	1	2	76	1
74	80	1	1	12	1	77	1	2	2	4		0	1	0	2	95	0
34	85	1	1	3	1	4	1	2	2	4		0	0	0	2	70	1
31	85	0	0	3	0	8	1	2	2	4		1	0	0	2	60	1
31	84	1	0	24	1	96	1	2	2	4		1	0	0	2	64	1
30	81	1	1	3	1	3	1	2	2	4		0	0	0	0	67	1
25	88	1	1	5	1	37	1	2	2	4		0	1	0	2	96	0
26	88	1	0	32	1	37	1	2	2	4		1	0	0	2	65	0
98	93	1	0	17	0	34	1	2	1	4		0	1	1	3	110	0
98	84	1	0	3	0	10	1	2	1	4		0	1	0	4	60	1
98	91	1	0	4	0	20	1	2	1	4		0	0	0	2	61	1
98	86	1	0	8	0	10	1	2	1	4		0	1	0	3	72	0
98	85	1	0	0	0	18	1	2	1	4		0	0	0	2	72	1
98	84	1	0	1	0	22	1	2	1	4		0	0	0	2	70	0
98	80	1	0	8	1	22	1	2	1	4		1	1	0	4	87	0
98	85	1	0	4	1	20	1	2	1	4		0	0	0	3	71	1
95	86	0	1	1	1	2	1	2	1	4		0	1	0	1	107	0
95	80	0	0	11	1	21	1	2	1	4		0	1	0	2	73	1
91	91	1	0	5	0	10	1	2	1	4	2	1	0	0	2	66	1
90	100	1	1	1	1	2	1	2	1	4		0	1	0	2	77	1
91	87	1	1	6	1	27	1	2	1	4		1	1	0	1	86	0
89	86	1	1	3	1	3	1	2	1	4		0	1	0	2	88	1
89	87	1	1	5	1	5	1	2	1	4		0	1	0	2	92	1
82	88	0	0	5	0	20	1	2	1	4		0	0	0	1	62	0
82	85	1	0	11	0	16	1	2	1	4		0	0	0	2	57	0
82	101	0	1	7	1	7	1	2	1	4		0	1	0	2	88	1
80	85	0	0	2	0	4	1	2	1	4		0	0	0	1	50	1
74	81	1	0	2	0	56	1	2	1	4		0	0	0	1	71	0
72	82	0	0	8	1	28	1	2	1	4		0	0	0	0	67
71	87	1	0	1	0	8	1	2	1	4		0	0	0	1	57
72	87	1	0	7	0	10	1	2	1	4		0	0	0	2	65
67	91	0	0	12	0	55	1	2	1	4		0	0	0	1	59	1
66	88	1	1	1	1	1	1	2	1	4		0	1	0	1	75	1
66	84	0	0	1	1	3	1	2	1	4		0	0	0	2	55	0
66	89	1	0	2	0	5	1	2	1	4		0	0	0	1	58	0
63	85	1	1	14	1	17	1	2	1	4		1	1	1	2	69	0
55	95	0	0	4	0	26	1	2	1	4		0	0	0	2	55	1
53	85	1	0	4	0	4	1	2	1	4		0	0	0	2	50	1
52	82	1	0	19	0	85	1	2	1	4		0	0	1	2	63	1
53	83	1	0	1	1	21	1	2	1	4		0	0	0	0	55	1
54	83	1	1	20	1	21	1	2	1	4		0	1	0	2	67	1
54	82	0	0	7	1	10	1	2	1	4		1	0	0	1	61	1
48	85	0	0	15	0	42	1	2	1	4		1	0	0	2	54	0
48	87	0	0	6	0	14	1	2	1	4		0	0	0	2	62	1
48	86	0	0	8	0	14	1	2	1	4		0	0	0	2	53	1
48	83	0	1	16	1	16	1	2	1	4		0	1	0	2	52	0
42	91	0	1	5	1	6	1	2	1	4		0	0	0	1	77
39	85	1	0	4	1	19	1	2	1	4		0	0	0	2	90	0
38	88	0	1	5	1	5	1	2	1	4		0	0	0	2	62	1
36	88	0	0	4	0	4	1	2	1	4		0	0	0	2	60	1
35	83	1	0	16	0	42	1	2	1	4		0	0	0	2	86	1
35	91	1	0	5	0	14	1	2	1	4		1	1	0	2	67	0
35	90	0	0	10	1	31	1	2	1	4		0	0	0	2	62	1
35	82	1	0	5	0	13	1	2	1	4		1	0	0	1	68	1
34	91	0	1	27	1	28	1	2	1	4		0	1	0	1	77	0
31	81	1	0	4	0	7	1	2	1	4		1	0	0	2	52	1
31	85	0	0	3	0	6	1	2	1	4		1	0	0	2	57	1
30	81	1	0	3	0	8	1	2	1	4		0	0	0	0	54	1
25	88	0	0	2	0	23	1	2	1	4		1	0	0	1	62	1
25	85	1	0	3	0	6	1	2	1	4		0	0	0	2	55	1
25	92	1	0	7	0	12	1	2	1	4		0	0	0	1	61	1
25	89	1	0	3	0	39	1	2	1	4		1	0	0	2	57	1
26	88	0	0	2	0	23	1	2	1	4		0	0	0	2	59	1
27	88	0	0	2	0	23	1	2	1	4		1	0	0	1	53	1
27	85	1	0	2	0	8	1	2	1	4		0	0	0	2	55	1
27	82	0	0	5	0	8	1	2	1	4		0	1	0	2	63	0
28	89	1	0	5	0	8	1	2	1	4		0	0	0	1	62	0
28	87	0	0	2	0	15	1	2	1	4		1	0	0	2	54	1
26	90	0	0	3	1	8	1	2	1	4		0	0	0	1	54	1
26	91	0	1	23	1	23	1	2	1	4		0	1	0	2	97	1
26	83	1	0	1	1	29	1	2	1	4		0	0	0	1	52	1
28	90	0	1	8	1	8	1	2	1	4		1	1	1	2	75	1
28	83	1	1	2	1	29	1	2	1	4		0	1	0	2	93	1
26	86	1	0	2	0	203	1	2	1	4		0	0	0	2	73	1
27	85	1	0	52	0	203	1	2	1	4		1	1	1	2	68	1
28	88	1	0	2	0	28	1	2	1	4		0	0	0	2	60	1
28	95	0	0	2	0	7	1	2	1	4		0	0	0	1	55	0
28	87	1	1	26	1	26	1	2	1	4		0	0	0	2	50	1
23	83	1	0	2	0	4	1	2	1	4		1	0	0	2	55	0
56	93	0	0	5	0	11	1	2	1	4		0	0	0	2	50	0
21	82	1	0	11	0	63	1	2	1	4		0	1	0	2	75	1
19	84	1	0	1	0	14	1	2	1	4		1	0	0	0	45	1
19	92	0	0	1	0	10	1	2	1	4		0	0	0	1	41	0
19	83	0	0	3	0	5	1	2	1	4		0	0	0	1	35	1
19	87	1	0	4	0	23	1	2	1	4		0	0	0	1	53	1
19	95	1	0	1	0	8	1	2	1	4		1	0	0	0	60	1
19	93	1	0	1	0	10	1	2	1	4		0	1	1	2	66	1
19	81	1	0	3	0	40	1	2	1	4		1	1	1	2	53	1
19	94	1	0	11	1	19	1	2	1	4		1	1	1	2	47	1
19	83	1	1	1	1	5	1	2	1	4		0	0	0	0	34	1
19	88	1	1	29	1	30	1	2	1	4		1	1	0	0	57	1
19	87	1	0	16	0	251	1	2	1	4		0	1	0	1	44	1
19	83	1	0	1	0	14	1	2	1	4		1	0	0	1	51	1
19	84	1	0	2	0	10	1	2	1	4		0	0	0	0	37	1
19	88	1	0	2	0	14	1	2	1	4		0	0	0	1	28	1
19	88	0	0	2	0	19	1	2	1	4		1	0	0	0	29	1
19	82	1	0	2	0	9	1	2	1	4		1	0	0	1	24	1
19	86	0	0	1	0	28	1	2	1	4		1	0	0	2	58	1
18	80	1	0	3	0	20	1	2	1	4		1	0	1	2	63	0
18	80	1	0	2	0	9	1	2	1	4		1	0	0	1	55	1
18	81	1	0	11	1	86	1	2	1	4		0	1	0	1	72	1
8	81	1	0	2	0	4	1	2	1	4		0	0	0	2	52	1
9	89	1	0	5	0	10	1	2	1	4		1	0	0	2	69	1
9	93	1	0	3	0	15	1	2	1	4		0	0	0	2	64	0
10	82	0	0	7	0	21	1	2	1	4		0	0	0	1	64	0
10	80	1	0	5	0	9	1	2	1	4		0	0	0	1	61	1
10	85	0	0	14	0	35	1	2	1	4		0	0	0	2	57	0
11	97	1	0	22	1	34	1	2	1	4		0	1	1	1	72	1
11	90	0	1	14	1	14	1	2	1	4		0	1	0	1	52	1
8	87	0	0	2	0	7	1	2	1	4		0	0	0	1	50	1
10	86	1	0	4	0	8	1	2	1	4		0	0	0	1	57	1
10	88	1	0	2	0	17	1	2	1	4		0	0	0	1	58	1
12	98	0	0	24	0	85	1	2	1	4		1	1	0	2	57	1
8	84	1	0	4	1	22	1	2	1	4		1	0	0	2	55	1
18	91	0	0	9	1	53	1	3	2	4		0	1	0	2	67	1
98	81	0	0	4	0	20	1	3	1	4		0	0	0	2	63	0
98	84	0	1	12	1	27	1	3	1	4		0	1	0	5	73	1
97	93	1	0	1	0	11	1	3	1	4		0	0	0	2	61	0
95	82	0	0	2	0	6	1	3	1	4		0	0	0	2	64	1
90	95	1	0	14	0	23	1	3	1	4		0	1	0	2	55	0
90	85	1	0	3	0	6	1	3	1	4		0	0	0	2	50	0
90	96	0	0	4	0	5	1	3	1	4		0	0	0	1	54	0
83	90	1	0	10	0	21	1	3	1	4		0	0	0	1	52	0
83	88	0	0	2	0	4	1	3	1	4		0	0	0	1	52	0
82	87	1	0	5	0	8	1	3	1	4		0	0	0	2	55	0
82	90	0	0	2	0	8	1	3	1	4		0	0	0	2	50	1
80	83	1	0	1	0	4	1	3	1	4		0	0	0	1	52	0
66	83	1	0	5	0	8	1	3	1	4		0	0	0	2	50	0
66	84	0	0	1	0	21	1	3	1	4		0	0	0	2	49	0
48	87	1	0	10	0	59	1	3	1	4		0	1	0	2	53	0
48	87	1	0	10	0	21	1	3	1	4		0	0	0	2	49	1
48	93	0	1	3	1	3	1	3	1	4		0	0	0	2	52	1
34	86	0	0	10	0	67	1	3	1	4		0	0	0	2	62	0
34	80	0	0	1	0	4	1	3	1	4		0	0	0	2	50	0
24	90	1	0	2	0	29	1	3	1	4		0	0	0	2	59	1
25	89	1	0	2	0	29	1	3	1	4		0	0	0	2	52	1
25	80	1	0	6	0	6	1	3	1	4		0	0	0	1	52	0
26	83	0	0	1	0	16	1	3	1	4		0	0	0	1	45	0
27	85	0	0	5	0	7	1	3	1	4		0	0	0	2	50	0
26	95	0	0	22	1	80	1	3	1	4		1	0	0	2	62	1
27	82	1	0	1	1	162	1	3	1	4		0	0	0	2	50	1
24	88	1	0	1	0	40	1	3	1	4		0	0	0	2	52	1
26	83	1	0	4	0	57	1	3	1	4		0	0	0	2	62	1
23	84	0	0	1	0	2	1	3	1	4		0	0	0	0	46	0
57	98	0	0	3	0	13	1	3	1	4		0	0	0	1	50	0
21	80	0	0	6	0	28	1	3	1	4	3	1	0	0	2	59	0
19	83	1	0	1	0	2	1	3	1	4		0	1	0	1	41	1
19	88	0	0	1	1	29	1	3	1	4		1	0	0	1	34	1
18	93	1	0	1	0	3	1	3	1	4		0	0	0	1	53	1
18	81	1	0	3	0	4	1	3	1	4		0	0	0	2	47	0
18	82	1	0	1	0	3	1	3	1	4		0	0	0	2	52	0
18	85	1	0	8	0	21	1	3	1	4		1	0	0	2	53	1
18	81	1	0	2	0	2	1	3	1	4		0	0	0	2	45	0
18	88	0	0	2	0	7	1	3	1	4		0	1	0	2	62	1
18	86	1	0	2	0	16	1	3	1	4		0	0	0	1	52	1
18	89	1	0	6	1	15	1	3	1	4		1	0	0	2	73	1
12	90	0	0	3	0	21	1	3	1	4		0	0	0	1	42	1
98	85	0	0	23	0	23	1	4	2	4		0	0	0	2	57	0
98	82	1	0	4	0	7	1	4	2	4		0	0	0	2	81	0
98	80	1	0	4	0	12	1	4	2	4		1	0	0	2	71	0
98	87	1	1	0	1	0	1	4	2	4		1	0	0	2	83	1
98	81	1	0	3	1	6	1	4	2	4		0	0	0	3	79	1
98	82	0	0	11	1	145	1	4	2	4		0	0	0	2	89	1
83	80	1	0	5	0	14	1	4	2	4		0	0	0	2	66	1
52	89	0	1	15	1	55	1	4	2	4		0	1	0	2	85	1
27	95	0	1	4	1	4	1	4	2	4		0	0	0	2	63	1
98	91	1	0	5	0	28	3	4	1	4		0	0	0	3	71	1
98	80	1	0	5	0	19	3	4	1	4		0	0	0	5	80	0
98	97	1	0	1	0	7	1	4	1	4		0	0	0	3	74	1
98	80	0	0	3	0	5	1	4	1	4		0	1	0	2	69	1
98	90	0	0	6	0	34	1	4	1	4		0	0	0	2	82	0
98	94	0	0	15	0	22	1	4	1	4		0	0	0	4	73	0
98	92	0	0	11	1	99	1	4	1	4		0	0	0	3	76	1
98	93	1	0	5	1	11	1	4	1	4		1	0	0	2	73	1
98	94	0	0	2	1	33	1	4	1	4		0	0	0	2	77	0
88	82	1	1	6	1	7	1	4	1	4		0	1	1	2	79	1
78	86	1	0	3	0	136	1	4	1	4		0	0	0	1	68	1
67	80	1	1	18	1	24	1	4	1	4		1	1	0	2	67	1
64	95	1	0	2	0	4	1	4	1	4		1	0	0	1	50	1
59	85	1	0	3	0	8	1	4	1	4		0	0	0	2	56	1
55	95	0	0	10	0	15	1	4	1	4		1	0	0	2	52	1
55	88	0	1	34	1	34	1	4	1	4		0	1	0	1	59	0
55	89	1	0	1	0	2	1	4	1	4		0	0	0	2	47	0
55	81	1	0	5	1	30	1	4	1	4		1	0	0	1	59	0
34	85	0	0	10	0	17	1	4	1	4		1	0	0	2	66	0
34	87	0	0	12	0	20	1	4	1	4		0	0	0	2	69	1
28	95	0	1	10	1	80	1	4	1	4		1	0	0	2	55	1
20	86	1	1	3	1	15	1	4	1	4		0	0	0	1	80	0
19	94	0	0	9	1	80	1	4	1	4		1	0	0	1	61	1
19	96	0	0	15	1	44	1	4	1	4		1	0	0	1	40	1
18	89	1	0	1	0	5	1	4	1	4		1	0	0	2	58	1
98	80	0	1	1	1	1	1	5	1	4		0	0	0	3	87	1
98	88	0	0	2	1	6	1	5	1	4		0	0	0	2	69	1
92	94	1	0	3	0	3	1	5	1	4		0	0	0	2	71	1
90	84	1	1	4	1	35	1	5	1	4		0	1	0	2	64	0
85	80	1	0	9	0	15	1	5	1	4		0	0	0	1	58	1
77	87	1	1	10	1	10	1	5	1	4		1	0	0	2	71	0
70	80	1	0	8	1	10	1	5	1	4		0	0	0	1	55
71	80	1	0	7	1	17	1	5	1	4		0	0	1	2	65
55	95	0	0	5	0	25	1	5	1	4		0	0	0	2	54	0
51	82	0	0	4	0	5	1	5	1	4		0	0	0	2	57	1
51	86	1	0	86	0	120	1	5	1	4		1	0	0	1	66	0
46	95	0	0	11	0	14	1	5	1	4		0	1	0	2	50	1
46	86	1	0	2	0	4	1	5	1	4		0	0	0	2	52	1
39	83	0	1	29	1	29	1	5	1	4		0	1	0	2	82	0
36	84	1	0	5	0	9	1	5	1	4		0	0	0	2	49	0
34	93	0	0	4	0	58	1	5	1	4		0	0	0	1	54	0
31	85	0	0	4	0	8	1	5	1	4		1	0	0	2	57	1
27	95	1	0	5	0	14	1	5	1	4		0	0	0	2	57	1
28	84	1	0	6	0	34	1	5	1	4		0	0	0	2	56	1
18	102	1	0	1	0	3	1	5	1	4		0	0	0	2	54	0
18	89	0	0	2	0	4	1	5	1	4		0	0	0	1	50	1
9	91	1	0	1	0	8	1	5	1	4		0	0	0	2	54	1
13	81	1	0	2	0	3	1	5	1	4		0	0	0	2	52	0
13	89	0	0	3	0	8	1	5	1	4		0	0	0	1	49	0
13	80	1	0	3	0	5	1	5	1	4		0	0	0	2	52	0
98	80	0	0	2	0	7	1	6	1	4		0	0	0	6	69	1
98	85	1	0	5	1	35	1	6	1	4		0	0	0	4	74	1
81	82	1	0	5	0	19	1	6	1	4		0	0	0	2	96	0
78	89	0	0	3	1	29	1	6	1	4		0	0	0	2	50	1
72	80	1	1	10	1	17	1	6	1	4		0	0	0	2	63
54	88	1	1	54	1	54	1	6	1	4		1	1	1	1	60	1
34	91	1	0	3	0	20	1	6	1	4		0	0	0	2	61	0
30	81	1	0	1	0	7	1	6	1	4		0	0	0	0	50	1
28	83	1	0	2	0	57	1	6	1	4		0	0	0	2	52	1
21	88	1	0	2	0	13	1	6	1	4		0	1	0	1	72	1
19	82	0	0	1	0	2	1	6	1	4		0	0	0	2	38	1
18	86	0	0	3	0	5	1	6	1	4		1	0	0	2	53	1
8	87	1	1	2	1	3	1	6	1	4		0	1	1	2	73	1
90	86	1	0	7	0	11	1	7	1	4		0	1	0	2	50	0
77	88	1	0	2	0	3	1	7	1	4		0	0	0	1	50	1
71	87	0	1	12	1	12	1	7	1	4		0	0	0	1	54
35	89	1	1	7	1	7	1	7	1	4		0	0	0	2	81	1
31	94	0	0	10	0	23	1	7	1	4		1	0	0	1	55	0
30	94	0	0	4	0	6	1	7	1	4		0	0	0	0	53	0
8	88	0	0	8	0	11	1	7	1	4		0	0	0	2	52	1
8	81	0	0	3	0	6	1	7	1	4		0	0	0	2	50	1
11	93	0	0	2	0	3	1	7	1	4		0	0	0	1	50	1
31	85	0	0	1	0	3	1	9	2	4		1	0	0	2	60	1
98	81	1	0	2	0	8	1	9	1	4		0	0	0	3	62	1
98	82	1	0	3	1	23	1	9	1	4		0	0	0	4	64	1
98	83	0	1	4	1	3	1	9	1	4		0	0	0	2	75	1
91	96	0	0	3	0	3	1	9	1	4		0	0	0	1	52	1
82	82	0	0	1	0	12	1	9	1	4		0	0	0	1	45	0
71	82	0	0	4	1	28	1	9	1	4		0	0	0	0	50
68	93	0	1	12	1	12	1	9	1	4		0	1	0	1	98	0
52	88	1	0	26	1	207	1	9	1	4		0	1	0	2	56	1
31	86	0	0	3	1	28	1	9	1	4		1	0	0	2	65	1
24	84	1	0	2	0	5	1	9	1	4		0	0	0	1	37	0
24	91	0	0	1	0	6	1	9	1	4		0	0	0	2	51	1
23	83	1	0	3	0	9	1	9	1	4		0	0	0	1	57	1
19	92	0	0	2	0	14	1	9	1	4		0	1	0	1	11	1
18	82	1	0	2	1	12	1	9	1	4		1	0	0	2	62	0
17	86	0	1	4	1	4	1	9	1	4		0	0	0	1	93	1
14	92	0	0	2	0	2	1	9	1	4		0	0	0	1	50	0
98	81	0	0	14	1	32	3	1	2	5		0	0	0	4	78	0
98	89	0	0	3	0	20	3	1	1	5		0	0	0	2	90
98	81	0	0	2	0	10	1	2	1	5		0	0	0	2	61	1
98	80	0	0	5	0	12	1	3	2	5		0	0	0	4	50	0
98	89	0	0	4	0	8	1	3	1	5		0	0	0	4	58	1
98	85	0	0	3	0	9	1	4	2	5		1	0	0	3	66	1
98	87	0	1	1	1	1	1	4	1	5		0	0	0	2	99	1
98	83	0	0	2	0	8	1	6	1	5		0	0	0	5	69	0
98	83	0	0	2	0	8	1	9	2	5		1	0	0	4	67	1
98	80	0	0	4	1	20	3	#NULL!	2	6		0	1	0	2	56	1
98	83	0	0	2	0	3	3	#NULL!	1	6		0	0	0	3	63	0
98	85	0	0	1	0	7	3	1	2	6		0	0	0	5	57	0
98	84	0	0	1	0	4	3	1	2	6		0	0	0	3	45	1
98	89	0	0	1	0	3	3	1	2	6		0	0	0	2	48	1
98	87	0	0	3	1	12	3	1	2	6		0	0	0	4	51	0
98	82	0	0	2	0	19	3	1	1	6		0	0	0	3	55	0
98	81	0	0	3	0	7	3	1	1	6		0	0	0	5	52	0
98	88	1	0	4	0	19	3	1	1	6		0	0	0	3	48	0
98	83	1	0	3	0	54	3	1	1	6		0	1	0	6	62	1
98	82	1	0	3	0	55	3	1	1	6		0	0	0	6	48	0
98	83	1	0	1	0	6	3	1	1	6		0	0	0	2	48	0
98	92	1	0	2	0	12	3	1	1	6		0	0	0	2	45	0
98	88	0	0	1	0	9	3	1	2	6		0	0	0	2	63	1
98	82	0	0	1	0	2	3	1	2	6		0	0	0	2	62	0
98	86	0	1	5	1	25	3	1	2	6		0	0	0	2	66	1
98	84	0	1	25	1	25	3	1	2	6		0	0	1	4	75	0
98	83	0	0	10	0	15	3	1	2	6		0	0	0	3	67	1
98	85	0	0	1	0	12	3	1	2	6		0	0	0	3	61	0
98	93	1	0	4	0	32	3	1	2	6		0	0	0	2	73	0
98	84	0	0	4	0	11	3	1	2	6		0	0	0	3	97	1
98	81	0	0	3	0	20	3	1	2	6		0	0	0	2	57	0
98	88	1	0	3	1	3	3	1	2	6		0	0	0	5	72	0
98	81	0	0	3	1	16	3	1	2	6		0	0	0	2	74	1
98	89	1	0	5	1	20	3	1	2	6		0	1	0	3	67	1
96	86	0	1	3	1	3	3	1	2	6					2	62	0
26	88	0	0	13	0	24	3	1	2	6		1	1	0	2	77	1
29	91	0	1	3	1	3	3	1	2	6		0	1	0	2	57	0
23	84	1	0	3	0	93	3	1	2	6		0	0	0	2	73	1
19	80	0	0	5	0	57	3	1	2	6		0	0	0	0	19	1
1	85	1	0	6	1	38	3	1	2	6		1	0	0	2	79	1
2	85	0	1	3	1	4	3	1	2	6		0	0	0	2	77	1
98	83	1	0	1	0	5	3	1	1	6		0	0	1	6	88	0
98	93	1	0	2	0	3	3	1	1	6		0	0	0	3	94	1
98	81	0	0	3	0	6	3	1	1	6		0	1	0	3	91	0
98	90	1	1	15	1	15	3	1	1	6		1	1	0	4	70	1
98	85	1	1	2	1	66	3	1	1	6		0	0	0	2	62	0
98	84	0	0	11	0	21	3	1	1	6		0	0	0	2	63	0
98	88	0	0	1	0	9	3	1	1	6		0	0	0	2	57	1
98	96	0	0	4	0	24	3	1	1	6		0	1	0	3	78	1
98	96	0	0	3	0	11	3	1	1	6		0	0	0	3	76	0
98	82	1	0	2	0	10	3	1	1	6		0	0	0	2	62	1
98	93	0	0	3	1	12	3	1	1	6		0	1	0	3	65	1
98	88	0	1	1	1	1	3	1	1	6		0	0	0	2	106	0
97	87	1	1	1	1	1	3	1	1	6		0	1	0	2	80	0
96	81	0	1	20	1	22	3	1	1	6		0	0	0	2	49	0
95	81	1	0	2	0	9	3	1	1	6		0	0	0	2	51	0
95	82	0	0	9	0	17	3	1	1	6		0	0	0	1	59	0
95	83	1	0	11	1	12	3	1	1	6		0	0	0	2	60	0
90	83	0	0	7	0	15	3	1	1	6		0	1	0	2	51	0
90	81	0	0	5	0	31	3	1	1	6		0	0	0	1	51	0
91	81	1	0	9	0	32	3	1	1	6		0	0	0	2	55	1
91	84	0	0	7	0	17	3	1	1	6		0	0	0	1	56	1
92	82	0	0	9	0	14	3	1	1	6		0	1	0	2	45	0
92	80	1	0	5	0	30	3	1	1	6		1	1	0	2	100	0
92	88	1	0	14	0	32	3	1	1	6		0	1	0	2	53	1
92	94	0	0	3	0	13	3	1	1	6		0	1	0	1	63	1
93	80	1	0	6	0	30	3	1	1	6		0	1	0	2	65	0
93	80	1	0	8	0	14	3	1	1	6		0	1	0	1	69	0
88	84	1	1	16	1	17	3	1	1	6		0	0	0	1	57	0
89	81	1	1	1	1	1	3	1	1	6		0	1	0	2	97	0
89	84	1	1	12	1	27	3	1	1	6		0	1	0	1	72	1
83	81	0	1	2	1	3	3	1	1	6		0	1	0	2	71	0
81	84	0	0	2	0	6	3	1	1	6		0	0	0	1	52	0
81	80	1	0	1	0	29	3	1	1	6		0	0	0	1	73	1
81	83	1	0	2	0	7	3	1	1	6		0	0	0	2	49	0
81	86	1	1	10	1	19	3	1	1	6		0	1	0	1	84	0
77	91	0	0	3	0	7	3	1	1	6		1	0	0	1	65	0
75	87	0	0	3	0	22	3	1	1	6		0	1	0	1	67	1
71	88	0	0	8	0	20	3	1	1	6		0	0	0	1	52
65	81	0	0	12	0	46	3	1	1	6		0	1	0	2	70	0
61	85	0	0	2	0	36	3	1	1	6		0	0	0	1	61	0
61	92	1	1	18	1	19	3	1	1	6		0	0	0	2	77	1
53	86	1	0	23	0	36	3	1	1	6		0	0	0	2	53	1
50	91	1	1	9	1	10	3	1	1	6		0	0	0	1	55	0
50	86	1	1	3	1	5	3	1	1	6		0	0	0	2	90	0
37	91	0	1	4	1	4	3	1	1	6		0	1	1	2	69	0
38	84	1	0	31	1	52	3	1	1	6		1	1	0	1	69	1
36	88	0	0	11	1	346	3	1	1	6		0	0	0	2	51	0
25	83	0	0	7	0	24	3	1	1	6		0	1	0	1	72	0
29	90	1	0	1	0	44	3	1	1	6		0	0	0	1	58	0
29	89	0	0	2	0	6	3	1	1	6		0	0	0	1	46	0
29	82	1	0	15	0	35	3	1	1	6		0	0	0	1	59	1
29	85	0	1	6	1	7	3	1	1	6		1	1	0	2	63	0
23	80	1	0	3	0	15	3	1	1	6		0	0	0	1	46	0
21	81	1	0	4	0	10	3	1	1	6	2	0	0	1	2	64	0
21	87	0	0	3	0	19	3	1	1	6		1	0	0	2	58	0
21	87	0	0	1	0	6	3	1	1	6		0	0	0	2	32	1
21	82	0	0	3	0	10	3	1	1	6		0	0	0	1	32	0
21	80	1	0	2	0	7	3	1	1	6		0	0	1	2	53	1
21	91	0	0	13	1	29	3	1	1	6		0	0	0	0	23	1
19	87	0	0	3	0	35	3	1	1	6		0	0	0	0	52	1
18	92	1	0	3	0	19	3	1	1	6		0	1	0	1	54	1
17	83	1	0	6	0	11	3	1	1	6		0	1	0	2	62
17	80	1	0	2	0	14	3	1	1	6		0	0	0	1	54
17	84	1	0	5	0	11	3	1	1	6		0	0	0	2	53	0
15	87	1	0	7	0	39	3	1	1	6		0	1	0	2	92	1
15	93	0	0	6	0	18	3	1	1	6		0	1	0	1	71	0
15	82	1	0	9	0	12	3	1	1	6		0	0	0	2	73	0
15	83	1	0	3	1	7	3	1	1	6		0	0	0	2	49	0
15	85	1	0	1	1	26	3	1	1	6		0	0	0	1	81	1
15	85	0	1	1	1	1	3	1	1	6		0	1	0	2	74	1
14	91	0	0	10	0	30	3	1	1	6		0	0	0	2	72	1
14	80	1	1	16	1	17	3	1	1	6		0	1	1	1	82	0
7	81	1	0	2	0	2	3	1	1	6					1	53	0
6	83	0	0	2	0	20	3	1	1	6		0	0	0	1	50	0
5	87	0	1	7	1	8	3	1	1	6		0	1	0	2	53	1
4	93	1	0	6	1	15	3	1	1	6		0	1	0	2	63	1
2	84	0	0	1	0	11	3	1	1	6		1	0	0	1	60	1
2	81	0	0	1	0	11	3	1	1	6		0	0	0	2	70	1
1	81	1	0	1	1	12	3	1	1	6		0	0	0	1	63	0
1	87	0	1	6	1	7	3	1	1	6		0	0	0	1	92	1
1	82	0	0	1	1	10	3	1	1	6		0	0	0	1	79	0
2	92	0	1	1	1	2	3	1	1	6		1	0	0	1	72	1
2	82	0	0	8	1	51	3	1	1	6		0	1	0	2	79	1
2	90	1	1	10	1	16	3	1	1	6		0	0	0	1	78	1
2	86	1	0	3	1	12	3	1	1	6		0	0	0	2	58	1
2	85	1	0	2	1	4	3	1	1	6		0	0	0	2	60	0
3	83	1	0	1	1	15	3	1	1	6		0	0	0	2	53	1
3	90	1	0	5	1	16	3	1	1	6		0	0	0	0	82	1
98	84	0	0	1	0	20	1	2	2	6		0	0	0	4	81	1
98	89	1	0	3	0	9	1	2	2	6		0	0	0	2	57	1
98	80	1	0	4	0	24	1	2	2	6		1	1	0	2	103	1
98	81	0	1	0	1	0	1	2	2	6		0	1	0	2	99	0
98	80	0	0	2	0	31	3	2	2	6		0	1	0	2	70	0
98	85	1	0	1	0	5	1	2	2	6		1	0	0	3	48	0
98	83	1	0	2	0	14	1	2	2	6		0	0	0	3	69	1
98	82	0	0	0	0	6	1	2	2	6		0	1	0	3	94	1
98	80	1	0	3	0	22	1	2	2	6		0	0	0	2	85	1
98	82	0	0	10	0	52	1	2	2	6		1	0	0	2	68	0
98	85	1	0	6	0	9	1	2	2	6		0	1	0	3	103	1
98	80	0	0	0	1	1	3	2	2	6		0	1	0	2	64	1
98	88	1	0	2	1	16	1	2	2	6		1	1	0	5	63	0
98	80	1	1	1	1	1	1	2	2	6		0	0	0	2	74	1
98	81	1	1	6	1	9	1	2	2	6		1	0	0	3	77	1
95	81	1	0	7	1	21	1	2	2	6		0	0	0	2	73	0
90	80	1	1	3	1	6	1	2	2	6		1	1	1	2	93	0
85	90	0	0	1	1	7	1	2	2	6		0	0	0	2	69	1
83	94	1	0	4	0	4	1	2	2	6		0	0	0	2	67	0
61	85	1	1	8	1	8	1	2	2	6		0	0	0	2	63	1
52	84	1	0	4	1	15	1	2	2	6		0	0	0	2	75	1
54	80	0	0	8	1	25	1	2	2	6		0	0	0	2	57	1
51	85	1	0	30	1	39	1	2	2	6		1	0	0	2	74	1
48	87	1	1	8	1	13	1	2	2	6		0	0	0	2	74	1
44	85	1	0	1	0	5	1	2	2	6		0	0	0	2	67	1
44	94	0	0	2	0	4	1	2	2	6		0	0	0	2	70	1
37	82	0	1	1	1	96	1	2	2	6		0	1	0	2	100	1
30	80	0	0	4	0	17	1	2	2	6		0	0	0	0	65	1
27	90	1	0	7	0	26	1	2	2	6		1	0	0	2	74	1
27	80	0	0	4	0	19	1	2	2	6		0	0	0	2	76	1
23	81	1	0	10	0	14	1	2	2	6		0	1	0	0	68	1
21	80	1	0	3	1	34	1	2	2	6		0	0	0	1	37	0
19	94	0	0	1	0	5	1	2	2	6		0	0	0	0	44	1
18	90	1	0	11	0	26	1	2	2	6		1	1	0	2	76	1
18	82	1	1	6	1	14	1	2	2	6		1	1	0	2	75	0
18	93	1	0	3	1	16	1	2	2	6		1	0	0	2	68	1
16	89	0	0	5	0	11	1	2	2	6		0	0	0	2	65	0
9	87	1	0	4	0	9	1	2	2	6		0	0	0	2	69	1
9	80	0	0	4	0	35	1	2	2	6		0	0	0	2	74	1
12	87	1	0	7	0	11	1	2	2	6		0	0	0	2	77	1
98	80	1	0	3	0	8	1	2	1	6		0	0	0	3	61	1
98	86	1	0	7	0	17	1	2	1	6		0	0	0	2	87	1
98	80	0	0	19	0	30	1	2	1	6		0	1	0	3	69	1
98	83	0	0	8	1	12	1	2	1	6		0	1	1	3	71	0
98	93	0	0	8	1	9	1	2	1	6		0	0	0	2	71	1
98	82	1	1	4	1	8	1	2	1	6		0	1	0	2	54	1
98	96	0	0	3	0	10	1	2	1	6		0	1	0	5	69	1
98	86	1	0	1	1	3	1	2	1	6		0	1	0	6	52	1
98	84	0	1	1	1	1	1	2	1	6		0	1	0	4	91	1
98	92	0	1	7	1	7	1	2	1	6		0	1	0	7	72	1
97	86	1	0	10	0	27	1	2	1	6		0	1	0	1	65	0
97	81	0	1	1	1	2	1	2	1	6		0	1	0	1	56	0
97	88	0	1	1	1	1	1	2	1	6		0	1	0	2	94	0
97	85	1	0	22	1	35	1	2	1	6		0	1	1	1	82	0
97	87	1	0	19	1	350	1	2	1	6		1	0	0	2	68	0
93	80	1	0	3	0	16	1	2	1	6		1	1	0	2	85	1
91	85	1	1	2	1	3	1	2	1	6		1	1	0	2	76	0
89	80	0	1	12	1	20	1	2	1	6		0	1	0	1	79	0
85	84	1	0	7	1	22	1	2	1	6		0	1	0	1	60	1
86	90	0	1	2	1	13	1	2	1	6		1	0	0	2	73	1
82	84	1	0	2	0	6	1	2	1	6		0	0	0	2	55	1
79	83	1	0	6	0	23	1	2	1	6		0	0	0	2	66	0
77	88	0	0	9	0	14	1	2	1	6		0	0	0	1	53	0
75	88	0	0	2	0	34	1	2	1	6		0	0	0	1	68	0
72	95	0	0	5	0	10	1	2	1	6		0	0	0	0	65
72	86	1	0	9	0	31	1	2	1	6		1	0	0	1	66
66	82	1	0	2	0	4	1	2	1	6		0	0	0	1	55	0
66	87	0	1	13	1	13	1	2	1	6		0	1	0	2	50	0
65	88	1	0	32	1	54	1	2	1	6		0	1	0	2	79	0
59	87	0	0	4	0	29	1	2	1	6		0	0	0	0	61	1
53	84	0	0	4	0	7	1	2	1	6		0	0	0	1	50	1
54	92	0	0	3	0	13	1	2	1	6		1	0	0	1	57	0
52	90	1	1	3	1	3	1	2	1	6		0	1	0	2	67	1
53	92	1	0	1	1	69	1	2	1	6		0	0	0	2	60	1
54	92	1	0	4	1	69	1	2	1	6		0	0	0	2	59	1
51	85	0	0	6	0	15	1	2	1	6		0	0	0	2	52	1
48	93	0	0	5	0	92	1	2	1	6		0	0	0	2	58	0
46	81	1	0	23	0	26	1	2	1	6		0	0	0	2	60	1
44	86	0	1	1	1	11	1	2	1	6		0	1	1	2	92	1
37	95	0	0	3	0	7	1	2	1	6		0	0	0	1	50	0
37	83	1	1	2	1	2	1	2	1	6		0	1	1	1	52	1
37	100	1	0	2	1	25	1	2	1	6		0	0	0	1	55	1
37	90	0	0	7	1	41	1	2	1	6		0	0	0	2	52	0
36	80	1	0	4	0	7	1	2	1	6		0	0	0	1	59	0
36	83	0	1	8	1	8	1	2	1	6		0	1	0	2	70	0
36	89	0	0	2	1	13	1	2	1	6		0	0	0	2	55	0
35	90	1	0	12	0	47	1	2	1	6		0	0	0	2	59	1
35	90	1	0	16	0	24	1	2	1	6		1	0	0	2	73	1
35	87	0	1	7	1	7	1	2	1	6		0	1	0	2	76	1
34	83	0	0	6	0	21	1	2	1	6		0	0	0	1	56	0
34	85	1	0	6	1	12	1	2	1	6		0	0	0	1	59	1
30	81	0	0	17	0	26	1	2	1	6		1	1	0	0	82	0
30	99	0	1	12	1	12	1	2	1	6		0	1	0	0	97	1
25	88	0	0	16	0	50	1	2	1	6		1	1	0	2	60	1
25	99	0	0	3	0	12	1	2	1	6		0	0	0	2	52	1
26	88	0	0	3	0	6	1	2	1	6		0	0	0	1	50	0
26	94	0	0	3	0	6	1	2	1	6		0	0	0	1	57	0
26	93	0	0	9	0	45	1	2	1	6		0	0	0	0	61	1
27	89	1	0	5	0	13	1	2	1	6		0	0	0	2	59	0
27	88	0	0	4	0	16	1	2	1	6		0	0	0	2	58	1
27	86	0	0	5	0	6	1	2	1	6		0	0	0	1	53	1
28	88	0	0	2	0	5	1	2	1	6		0	0	0	1	58	0
28	85	1	0	4	0	29	1	2	1	6		0	0	0	1	55	0
28	93	0	0	7	0	45	1	2	1	6		0	0	0	2	63	1
29	100	1	0	1	0	8	1	2	1	6		0	0	0	2	59	0
24	82	0	1	6	1	27	1	2	1	6		0	1	1	2	87	0
25	85	0	1	2	1	16	1	2	1	6		1	1	0	2	68	1
27	90	0	1	2	1	14	1	2	1	6		1	0	0	2	64	1
28	90	0	0	3	1	14	1	2	1	6		0	0	0	2	50	1
28	101	1	1	14	1	15	1	2	1	6		0	0	0	2	50	1
28	86	0	1	12	1	12	1	2	1	6		0	0	0	2	59	0
56	82	1	0	21	0	43	1	2	1	6		1	1	0	1	63	0
56	86	0	0	14	0	22	1	2	1	6		1	0	1	2	64	1
57	82	1	0	5	0	9	1	2	1	6		0	0	0	2	57	0
23	83	0	1	32	1	32	1	2	1	6		0	1	1	1	53	0
56	85	0	1	23	1	23	1	2	1	6		0	1	0	2	45	1
21	80	1	0	1	0	5	1	2	1	6		0	1	0	2	61	0
21	88	1	0	6	1	46	1	2	1	6		0	0	0	0	43	1
19	84	0	0	1	0	12	1	2	1	6	1	1	0	0	2	53	1
19	97	0	0	1	0	6	1	2	1	6		0	0	0	2	63	1
19	89	0	0	6	0	16	1	2	1	6		1	0	0	2	38	1
19	89	0	0	1	0	2	1	2	1	6		1	0	0	0	75	1
19	92	0	0	1	0	6	1	2	1	6		0	1	1	2	60	0
19	102	0	0	4	0	10	1	2	1	6		1	0	0	0	41	1
19	84	1	0	1	0	12	1	2	1	6		1	0	0	1	38	1
19	93	1	0	1	0	10	1	2	1	6		1	1	0	1	48	1
19	87	1	0	1	0	29	1	2	1	6		0	0	0	1	34	1
19	81	0	0	3	0	20	1	2	1	6		0	0	0	1	45	1
19	89	1	0	21	1	165	1	2	1	6		1	1	0	2	84	1
19	84	1	0	4	1	36	1	2	1	6		1	0	1	2	48	1
19	94	0	0	12	1	88	1	2	1	6		0	0	0	1	37	1
18	84	0	0	1	0	3	1	2	1	6		0	0	0	1	57	1
17	89	1	0	2	0	10	1	2	1	6		0	0	0	2	71	0
17	85	0	0	1	0	3	1	2	1	6		0	0	0	1	69	0
17	83	0	0	7	0	43	1	2	1	6		1	0	0	1	64	1
17	85	1	0	2	1	39	1	2	1	6		0	0	0	1	79	0
15	83	1	0	5	0	27	1	2	1	6		0	1	0	1	68	0
15	97	0	1	24	1	25	1	2	1	6		0	1	0	1	79	1
15	97	0	0	4	1	16	1	2	1	6		0	0	0	0	68	0
8	91	0	0	2	0	30	1	2	1	6		0	0	0	1	49	1
8	84	1	0	5	0	10	1	2	1	6		0	0	0	1	54	1
8	88	1	0	10	0	72	1	2	1	6		1	0	0	2	60	1
9	87	1	0	4	0	14	1	2	1	6		0	0	0	2	57	0
9	84	0	0	6	0	14	1	2	1	6		0	0	0	2	61	1
9	87	1	0	4	0	28	1	2	1	6		0	0	0	2	55	0
12	87	1	0	1	0	6	1	2	1	6		0	0	0	2	73	1
12	90	1	0	1	0	3	1	2	1	6		0	0	0	1	52	1
8	82	1	0	6	1	13	1	2	1	6		0	0	0	2	67	1
9	87	0	0	12	1	79	1	2	1	6		0	1	0	2	64	1
9	87	1	0	3	1	13	1	2	1	6		0	0	0	2	69	1
10	93	0	1	1	1	63	1	2	1	6		0	0	0	2	73	1
12	91	1	0	2	1	28	1	2	1	6		0	0	1	2	59	1
14	80	0	0	8	1	42	1	2	1	6		0	1	0	2	68	1
7	87	1	1	16	1	79	1	2	1	6		0	1	1	1	108	1
4	88	1	0	6	0	30	1	2	1	6		0	0	0	2	62	1
98	82	0	0	5	0	12	1	3	2	6		0	0	0	2	66	0
98	81	0	0	1	1	20	1	3	2	6		0	0	0	2	71	0
98	86	1	0	1	1	3	1	3	2	6		0	0	0	5	66	0
98	80	0	0	8	1	13	1	3	2	6		0	0	0	2	78	1
98	90	0	1	3	1	2	1	3	2	6		0	1	0	4	66	1
95	82	0	0	3	1	6	1	3	2	6		0	0	0	2	73	0
90	82	1	0	1	0	4	1	3	2	6		0	0	0	2	53	1
74	88	0	0	2	0	21	1	3	2	6		0	0	0	2	56	1
66	81	0	0	2	0	3	1	3	2	6		0	0	0	2	58	0
61	89	1	0	1	0	23	1	3	2	6		0	0	0	2	71	1
31	85	0	0	4	0	23	1	3	2	6		1	0	0	2	65	1
24	83	0	0	1	0	7	1	3	2	6		0	0	0	2	61	0
25	83	0	0	2	0	7	1	3	2	6		1	0	0	2	67	0
25	81	1	0	17	0	50	1	3	2	6		1	1	0	2	96	0
10	82	0	0	7	1	21	1	3	2	6		0	0	0	0	55	1
98	88	1	0	4	0	6	1	3	1	6		0	1	0	2	64	0
98	86	0	0	4	0	6	1	3	1	6		0	0	0	3	63	1
98	81	1	0	5	0	6	1	3	1	6		0	0	0	5	55	0
95	85	0	0	5	0	17	1	3	1	6		0	1	0	2	73	1
90	83	1	0	1	0	11	1	3	1	6		0	0	0	2	50	1
90	82	0	0	5	0	7	1	3	1	6		0	0	0	1	53	0
90	91	0	0	9	0	9	1	3	1	6		0	0	0	2	54	1
90	81	0	0	2	0	2	1	3	1	6		0	0	0	1	45	0
90	83	0	0	6	0	8	1	3	1	6		0	0	0	2	50	0
91	90	0	0	9	1	36	1	3	1	6		0	0	0	2	70	1
82	82	0	0	9	0	9	1	3	1	6		0	0	0	1	45	1
80	85	1	1	20	1	20	1	3	1	6		1	1	0	2	53	1
78	85	1	0	3	0	19	1	3	1	6		0	0	0	2	50	1
74	87	0	0	2	0	10	1	3	1	6		0	0	0	1	40	0
64	87	0	1	54	1	54	1	3	1	6		0	1	0	1	53	1
55	87	1	0	5	0	11	1	3	1	6		0	0	0	2	51	0
55	95	0	1	4	1	13	1	3	1	6		0	1	0	2	70	1
54	80	0	0	19	0	23	1	3	1	6		1	0	0	2	47	1
54	91	0	1	4	1	4	1	3	1	6		0	0	0	1	57	0
48	82	1	1	3	1	3	1	3	1	6		1	0	0	2	82	1
44	89	0	1	8	1	13	1	3	1	6		1	1	0	2	67	1
24	85	1	0	1	0	21	1	3	1	6		0	0	0	1	53	1
26	91	1	0	3	0	8	1	3	1	6		1	0	0	1	57	0
27	83	0	0	5	0	9	1	3	1	6		0	0	0	1	53	0
29	81	0	0	1	0	1	1	3	1	6		0	0	0	1	45	0
58	82	1	0	1	0	3	1	3	1	6		0	0	0	1	46	0
21	90	0	0	1	0	5	1	3	1	6		1	0	0	2	66	0
19	89	0	0	5	0	22	1	3	1	6		1	0	0	0	64	1
19	86	0	0	1	0	2	1	3	1	6		0	0	0	0	20	1
18	82	0	0	1	0	29	1	3	1	6		0	0	0	2	53	1
18	88	1	0	1	0	3	1	3	1	6		0	0	0	1	50	0
18	87	1	0	3	0	15	1	3	1	6		0	1	0	2	52	0
18	88	1	0	5	0	15	1	3	1	6		1	1	0	2	68	0
18	88	1	0	9	0	12	1	3	1	6		1	1	0	2	62	0
9	88	0	0	4	0	9	1	3	1	6		0	0	0	2	54	1
10	81	1	0	1	0	7	1	3	1	6		0	0	0	2	47	0
12	85	1	0	2	0	4	1	3	1	6		0	0	0	1	58	1
98	85	0	1	2	1	2	1	4	2	6		0	1	0	2	74	0
98	84	1	0	2	0	8	1	4	2	6		1	0	1	5	45	1
98	81	0	0	2	0	29	1	4	2	6		0	0	0	2	48	1
98	81	1	0	4	0	16	1	4	2	6		1	1	0	2	69	1
98	80	1	0	2	0	2	1	4	2	6		0	0	0	2	70	1
98	86	0	0	3	0	24	1	4	2	6		0	0	0	3	66	1
98	91	1	1	5	1	10	1	4	2	6		0	1	0	2	57	1
98	86	1	0	0	1	1	1	4	2	6		1	0	0	3	110	0
98	83	1	0	1	1	28	1	4	2	6		0	0	0	3	70	0
98	81	0	1	2	1	2	1	4	2	6		1	0	1	4	88	1
98	86	0	1	0	1	0	1	4	2	6		0	0	0	2	84	0
55	83	1	0	3	1	10	1	4	2	6		0	0	0	2	70	0
51	94	0	0	10	0	15	1	4	2	6		1	0	0	2	68	1
51	85	0	1	19	1	32	1	4	2	6		1	0	0	2	61	1
48	93	1	1	1	1	17	1	4	2	6		0	1	0	2	124	0
21	93	0	0	1	1	2	1	4	2	6		0	0	0	1	30	1
20	85	0	1	2	1	2	1	4	2	6		0	0	0	2	75	0
18	80	1	0	3	0	10	1	4	2	6		1	0	0	2	60	0
16	86	1	0	4	0	22	1	4	2	6		1	0	0	2	67	0
12	87	1	1	1	1	1	1	4	2	6		0	1	0	2	78	1
98	83	0	0	7	0	11	1	4	1	6		1	0	0	5	88	0
98	85	0	0	10	0	14	1	4	1	6		0	1	0	2	57	1
98	83	1	0	4	0	4	3	4	1	6		0	0	0	6	86	1
98	82	0	1	7	1	7	1	4	1	6		0	1	0	5	70	1
90	89	1	0	9	0	22	1	4	1	6		0	1	0	1	63	1
91	81	0	0	5	0	26	1	4	1	6		0	0	0	2	69	1
92	82	0	0	6	0	9	1	4	1	6		0	1	0	2	63	0
85	91	0	0	4	0	14	1	4	1	6		1	1	0	2	63	1
85	87	0	0	2	0	9	1	4	1	6		1	0	0	2	58	1
86	84	1	1	1	1	22	1	4	1	6		1	1	0	2	78	1
80	85	1	0	4	0	9	1	4	1	6		0	0	0	1	70	0
75	81	1	0	4	0	28	1	4	1	6		0	1	0	1	56	0
64	89	0	1	1	1	39	1	4	1	6		1	0	0	1	71	1
55	81	0	0	9	0	58	1	4	1	6		0	0	0	2	62	1
55	93	1	1	5	1	5	1	4	1	6		1	0	0	2	50	1
25	97	0	0	11	1	89	1	4	1	6		0	1	0	1	66	1
27	97	0	0	1	1	89	1	4	1	6		0	1	0	1	65	1
29	97	0	0	1	1	89	1	4	1	6		0	0	0	1	63	1
19	83	1	0	2	0	9	1	4	1	6		1	1	0	0	36	1
12	86	0	0	2	0	17	1	4	1	6	2	0	0	0	2	51	0
8	87	0	0	3	1	36	1	4	1	6		1	1	0	1	53	0
12	87	0	1	2	1	36	1	4	1	6		0	1	0	2	106	0
4	88	1	0	1	0	1	1	4	1	6		0	0	0	2	65	1
98	80	0	0	2	0	10	1	5	2	6		0	0	0	2	47	0
98	86	1	0	1	0	2	1	5	2	6		0	0	0	4	68	0
98	83	1	0	1	0	4	1	5	2	6		0	0	0	3	63	1
98	86	0	0	5	0	21	1	5	2	6		0	0	0	2	67	1
98	83	0	0	2	1	9	1	5	2	6		0	0	0	2	71	1
95	81	0	1	2	1	2	1	5	2	6		0	1	0	2	90	0
55	91	0	0	6	1	11	1	5	2	6		0	0	0	2	78	1
54	85	0	0	7	1	158	1	5	2	6		0	0	0	2	58	1
31	83	0	0	2	0	16	1	5	2	6		1	0	0	2	57	1
30	94	0	1	10	1	112	1	5	2	6		0	0	0	0	74	1
58	84	1	0	4	0	93	1	5	2	6		0	0	0	1	57	1
56	82	1	1	3	1	42	1	5	2	6		0	1	1	2	89	1
21	89	1	0	2	0	21	1	5	2	6		0	0	0	1	58	1
12	83	1	0	1	1	14	1	5	2	6		0	0	0	2	70	1
4	83	0	0	3	0	81	1	5	2	6		0	0	0	2	57	1
98	87	0	0	1	0	2	1	5	1	6		0	0	0	3	58	1
98	84	1	0	2	0	6	1	5	1	6		0	0	0	2	61	0
98	81	0	0	4	0	9	1	5	1	6		0	0	0	3	75	0
98	82	0	0	8	1	40	1	5	1	6		0	0	0	2	50	1
98	88	0	0	26	0	42	1	5	1	6		1	0	0	2	68	0
98	80	1	0	4	0	8	1	5	1	6		0	0	0	3	71	1
98	84	0	0	3	0	9	1	5	1	6		0	0	0	3	63	1
95	83	1	0	2	0	4	1	5	1	6		0	0	0	2	50	0
95	81	1	1	4	1	4	1	5	1	6		0	1	0	2	71	0
84	88	0	0	2	0	5	1	5	1	6		0	0	0	2	57	0
82	88	1	1	2	1	2	1	5	1	6		0	0	0	2	54	1
70	84	0	0	2	0	4	1	5	1	6		0	0	0	0	51
71	85	0	0	1	0	4	1	5	1	6		0	0	0	0	83
71	84	0	0	1	0	4	1	5	1	6		0	0	0	0	50
71	82	1	0	4	1	13	1	5	1	6		0	0	0	1	56
72	87	0	1	7	1	7	1	5	1	6		0	0	0	2	61
72	86	0	1	10	1	10	1	5	1	6		0	0	0	1	54
55	89	0	0	6	0	78	1	5	1	6		0	0	0	2	57	0
52	84	1	1	2	1	3	1	5	1	6		0	1	0	2	87	1
46	99	0	0	7	0	17	1	5	1	6		0	0	0	2	52	1
31	85	1	0	43	1	192	1	5	1	6		0	1	1	2	60	1
24	90	1	0	6	0	44	1	5	1	6		0	1	0	2	81	0
24	81	1	0	1	0	3	1	5	1	6		0	0	0	1	56	0
24	85	0	0	4	0	13	1	5	1	6		0	0	0	1	44	0
25	86	1	0	4	0	4	1	5	1	6		0	0	0	1	50	0
21	82	1	0	1	0	3	1	5	1	6		0	0	0	1	57
21	86	0	0	48	0	136	1	5	1	6		0	0	0	2	45	1
18	94	0	0	1	0	5	1	5	1	6		0	0	0	1	57	1
17	80	0	1	1	1	1	1	5	1	6		0	1	0	1	86	0
12	81	0	0	4	0	5	1	5	1	6		0	0	0	2	46	1
13	80	0	0	3	0	4	1	5	1	6		0	0	0	2	50	0
13	90	0	0	1	0	9	1	5	1	6		0	0	0	1	50	0
8	87	0	0	5	1	79	1	5	1	6		0	0	0	2	61	1
10	84	1	0	22	1	251	1	5	1	6		0	1	0	2	57	0
13	84	1	0	22	1	251	1	5	1	6		0	1	1	2	37	0
98	81	1	0	2	0	3	1	6	2	6		0	0	0	4	69	1
39	83	1	0	2	0	24	1	6	2	6		0	0	0	2	81	0
31	82	1	0	4	1	65	1	6	2	6		1	0	0	2	82	1
29	81	1	0	3	0	14	1	6	2	6		0	0	1	2	66	0
25	89	1	1	4	1	10	1	6	2	6		1	1	1	2	104	1
27	89	1	0	4	1	10	1	6	2	6		0	0	0	2	72	1
56	88	0	0	2	0	12	1	6	2	6		0	0	0	2	70	0
56	84	1	0	4	0	34	1	6	2	6		0	0	0	2	57	0
21	88	1	0	1	0	25	1	6	2	6		0	1	0	2	49	1
8	91	1	0	6	0	12	1	6	2	6		0	0	0	2	66	1
98	82	0	0	4	0	9	1	6	1	6		0	0	0	3	72	1
98	82	1	0	1	0	2	1	6	1	6		0	0	0	5	71	0
98	82	0	1	7	1	7	1	6	1	6		1	0	1	2	78	0
90	83	0	1	51	1	56	1	6	1	6		1	1	0	2	60	1
90	90	0	0	8	1	36	1	6	1	6		0	0	0	2	69	1
46	81	1	0	11	0	31	1	6	1	6		0	0	1	2	76	1
44	87	1	1	63	1	63	1	6	1	6		0	1	1	2	55	1
46	85	0	1	9	1	19	1	6	1	6		0	1	1	1	80	1
37	81	0	0	4	0	23	1	6	1	6		0	0	0	2	55	1
24	85	0	0	2	0	16	1	6	1	6		0	0	0	2	52	1
28	92	1	0	7	1	11	1	6	1	6		0	0	0	1	60	0
18	89	1	0	2	0	7	1	6	1	6		0	0	0	2	61	1
5	93	1	0	2	1	10	1	6	1	6		0	0	0	2	59	0
98	84	0	1	0	1	0	1	7	2	6		0	1	0	3	75	1
90	81	0	0	4	0	8	1	7	2	6		0	0	0	2	53	1
83	87	1	0	20	0	45	1	7	2	6		0	0	0	2	58	0
71	83	0	0	5	1	21	1	7	2	6		0	0	0	2	78
71	85	0	0	3	1	4	1	7	2	6		0	0	0	2	78
72	86	0	1	1	1	4	1	7	2	6		0	0	0	2	74
54	90	1	0	1	0	6	1	7	2	6		0	0	0	2	60	1
54	85	0	0	4	1	14	1	7	2	6		0	0	0	2	63	0
51	92	0	0	6	0	10	1	7	2	6		0	0	0	2	63	1
51	90	0	0	2	1	11	1	7	2	6		0	0	0	2	69	1
38	82	0	0	67	1	96	1	7	2	6		1	1	0	2	61	1
24	80	0	0	1	0	48	1	7	2	6		0	0	0	2	61	0
25	95	0	0	5	0	11	1	7	2	6		0	0	0	2	71	1
27	80	0	0	1	0	15	1	7	2	6		0	0	0	2	66	0
26	86	1	0	3	1	16	1	7	2	6		0	0	0	2	64	1
29	82	0	0	6	1	29	1	7	2	6		0	0	0	2	58	1
23	95	0	0	2	0	8	1	7	2	6		0	0	0	2	63	0
56	83	1	0	2	0	93	1	7	2	6		0	0	0	1	47	1
22	90	0	1	4	1	7	1	7	2	6		0	0	0	0	42	1
16	90	0	1	19	1	23	1	7	2	6		1	0	0	2	65	0
12	84	0	1	3	1	4	1	7	2	6		0	0	0	2	69	1
91	89	0	0	1	0	8	1	7	1	6		0	0	0	2	54	1
90	88	0	1	3	1	5	1	7	1	6		1	1	0	2	63	0
91	88	0	0	2	1	5	1	7	1	6		0	0	0	2	63	0
89	82	1	1	1	1	10	1	7	1	6		0	1	1	2	82	1
84	88	0	0	1	0	14	1	7	1	6		0	0	0	2	60	1
85	91	1	0	1	1	4	1	7	1	6		0	0	0	0	65	1
80	82	0	0	1	0	5	1	7	1	6		0	0	0	2	50	1
80	85	0	1	6	1	7	1	7	1	6		0	0	0	2	64	1
75	80	1	0	1	0	5	1	7	1	6		0	0	0	2	50	0
71	90	1	0	3	0	4	1	7	1	6		0	0	0	2	56
72	88	0	0	2	0	20	1	7	1	6		0	1	0	1	76
66	84	0	0	4	0	7	1	7	1	6	1	0	0	0	2	69	0
66	83	0	0	1	0	8	1	7	1	6		0	0	0	1	54	0
64	84	1	0	3	0	7	1	7	1	6		0	0	0	1	50	1
61	93	1	0	1	1	17	1	7	1	6		0	0	0	2	63	1
55	83	0	0	6	0	9	1	7	1	6		0	0	0	2	62	0
52	85	0	0	8	0	11	1	7	1	6		0	0	0	1	52	1
52	83	1	0	4	0	16	1	7	1	6		0	0	0	2	61	1
52	82	1	0	15	0	16	1	7	1	6		0	0	0	1	57	1
52	95	1	0	6	0	30	1	7	1	6		1	0	0	2	52	1
54	80	1	0	4	0	42	1	7	1	6		0	0	0	2	57	1
54	82	1	0	12	0	40	1	7	1	6		0	0	0	2	50	0
48	82	0	0	7	0	85	1	7	1	6		0	0	0	2	47	0
47	82	0	0	10	0	10	1	7	1	6		0	0	0	1	50	1
34	85	1	0	4	1	53	1	7	1	6		0	0	0	2	50	1
34	80	1	0	2	1	37	1	7	1	6		0	0	0	1	55	0
30	81	1	0	5	0	5	1	7	1	6		0	0	0	0	60	1
30	80	0	0	9	0	17	1	7	1	6		0	0	0	0	53	1
25	89	0	0	1	0	6	1	7	1	6		0	0	0	1	50	0
25	80	0	0	1	0	4	1	7	1	6		0	0	0	1	50	1
26	82	0	0	2	0	4	1	7	1	6		0	0	0	1	50	0
27	87	0	0	2	0	2	1	7	1	6		0	0	0	1	52	1
27	88	1	0	8	0	11	1	7	1	6		0	1	0	2	47	0
27	89	1	0	3	0	7	1	7	1	6		0	0	0	2	52	0
27	85	0	0	10	0	54	1	7	1	6		0	0	0	1	60	0
28	93	1	0	3	0	7	1	7	1	6		0	0	0	2	52	0
28	91	1	0	4	0	25	1	7	1	6		0	0	0	0	52	0
57	82	1	0	7	0	10	1	7	1	6		0	0	0	2	60	0
56	80	1	1	5	1	213	1	7	1	6		0	0	0	2	59	0
21	89	0	0	1	0	12	1	7	1	6		0	0	0	1	48	1
21	84	0	0	3	0	19	1	7	1	6		0	0	0	2	53	0
21	87	0	0	2	0	13	1	7	1	6		0	0	0	1	53	0
21	87	0	0	2	0	6	1	7	1	6		0	0	0	1	53	0
21	93	0	0	4	0	10	1	7	1	6		0	1	1	2	58	1
19	87	0	0	2	0	43	1	7	1	6		0	0	0	1	45	1
18	86	1	0	2	0	18	1	7	1	6		0	0	0	2	57	0
18	88	1	0	1	0	3	1	7	1	6		0	0	0	2	60	0
18	80	1	0	4	1	16	1	7	1	6		1	0	0	2	55	1
17	84	1	1	5	1	5	1	7	1	6		1	1	0	1	61	0
17	93	1	0	21	1	27	1	7	1	6		0	1	0	0	56	0
17	81	0	1	16	1	16	1	7	1	6		0	1	0	2	69	0
15	90	1	0	4	1	11	1	7	1	6		0	0	0	2	55	1
11	84	0	0	2	0	7	1	7	1	6		0	0	0	2	60	1
11	86	0	0	3	0	14	1	7	1	6		0	0	0	1	50	0
12	85	1	0	3	0	11	1	7	1	6		0	0	0	1	50	0
12	89	1	0	4	0	24	1	7	1	6		1	0	0	2	61	1
13	92	0	0	4	0	7	1	7	1	6		1	0	0	2	66	1
4	82	0	1	1	1	1	1	7	1	6		0	0	0	2	87	1
98	80	0	0	2	0	20	3	9	2	6		0	0	0	2	81	0
98	83	0	0	1	0	2	1	9	2	6		0	0	0	4	48	1
98	80	1	0	3	0	13	1	9	2	6		0	0	0	2	69	1
98	83	1	0	2	1	12	1	9	2	6		0	0	0	3	80	1
98	80	1	0	1	1	4	1	9	2	6		0	0	0	2	71	0
52	80	0	0	12	0	16	1	9	2	6		0	0	0	2	60	0
34	91	0	0	1	0	28	1	9	2	6		0	0	0	2	58	0
30	80	0	0	1	1	4	1	9	2	6		0	0	0	0	73	1
26	92	0	0	1	1	2	1	9	2	6		0	0	0	2	85	1
27	85	0	0	3	1	8	1	9	2	6		0	0	0	2	79	1
5	80	1	1	4	1	12	1	9	2	6		1	1	0	2	83	0
98	83	0	0	0	0	11	1	9	1	6		0	0	0	2	48	1
98	81	0	0	2	0	12	1	9	1	6		0	0	0	4	63	1
98	89	0	0	4	0	40	1	9	1	6		0	1	0	2	75	1
98	88	0	0	1	0	23	1	9	1	6		1	0	0	2	75	1
98	85	0	0	1	0	8	1	9	1	6		0	0	0	3	64	1
98	84	1	1	1	1	9	1	9	1	6		1	0	0	2	48	1
98	86	1	0	2	1	28	1	9	1	6		0	0	0	2	50	1
74	85	1	1	12	1	25	1	9	1	6		0	0	0	2	77	0
74	92	1	1	2	1	29	1	9	1	6		0	1	0	1	68	0
71	84	0	0	2	0	4	1	9	1	6		0	0	0	1	53
72	85	0	0	2	0	4	1	9	1	6		0	0	0	1	69
66	93	1	0	1	0	2	1	9	1	6		0	0	0	1	50	0
59	86	0	1	3	1	3	1	9	1	6		0	0	0	1	53	1
55	83	0	0	2	1	5	1	9	1	6		0	0	0	2	51	1
54	83	0	0	3	0	6	1	9	1	6		0	0	0	2	37	0
51	85	0	0	4	1	13	1	9	1	6		0	1	0	1	62	1
44	84	0	0	2	0	3	1	9	1	6		0	0	0	2	55	1
37	82	0	0	4	1	60	1	9	1	6		0	0	0	0	51	0
34	92	0	0	3	0	15	1	9	1	6		0	0	0	2	50	0
34	80	0	0	6	0	24	1	9	1	6		0	0	0	1	55	0
30	81	0	0	1	0	8	1	9	1	6		0	0	0	0	50	0
25	90	1	0	15	0	44	1	9	1	6		0	0	0	2	80	0
28	97	1	0	1	0	3	1	9	1	6		0	0	0	2	44	1
23	83	0	0	2	0	4	1	9	1	6		0	0	0	1	52	0
19	92	0	0	1	0	9	1	9	1	6		0	0	0	2	42	1
19	92	1	1	1	1	2	1	9	1	6		0	0	0	1	55	1
18	90	0	0	4	0	8	1	9	1	6		0	0	0	1	47	1
18	87	1	0	1	0	6	1	9	1	6		0	0	0	2	55	1
8	91	0	0	2	1	37	1	9	1	6		0	0	0	1	62	0
12	91	0	0	2	1	37	1	9	1	6		1	0	0	1	59	0
14	90	0	1	22	1	22	1	9	1	6		0	1	1	1	67	1
1	84	1	1	10	1	35	1	9	1	6		0	1	0	0	103	1
2	84	1	0	9	1	35	1	9	1	6		0	0	1	1	117	1
98	84	1	0	5	0	20	3	1	1	9		0	0	0	6	52	0
74	80	1	1	15	1	25	3	1	2	9		1	0	0	2	91	1
77	82	1	0	5	0	24	3	1	1	9		1	0	0	2	65	0
65	89	0	0	2	0	33	3	1	1	9		0	0	0	1	53	0
98	83	0	1	1	1	1	1	2	2	9		0	1	0	2	75	0
98	82	1	1	7	1	7	1	2	2	9		0	1	0	4	98	1
98	83	0	1	2	1	2	1	2	2	9		0	1	0	2	75	1
71	88	1	0	6	0	23	1	2	2	9		0	0	0	2	70
72	88	1	0	1	0	23	1	2	2	9		0	0	0	0	63
31	89	1	0	5	1	35	1	2	2	9		1	0	0	2	69	1
21	81	1	0	8	1	13	1	2	2	9		0	1	0	2	63	1
17	81	0	0	5	0	22	1	2	2	9		0	1	1	2	90	0
98	80	1	0	6	0	24	1	2	1	9		1	0	0	3	83	1
78	85	1	0	1	0	10	1	2	1	9		0	0	0	1	62	1
54	81	0	0	8	0	9	1	2	1	9		0	0	0	1	50	1
30	80	0	0	4	0	7	1	2	1	9		0	0	0	0	52	1
23	82	1	0	4	0	25	1	2	1	9		0	0	0	2	59	0
57	80	1	1	14	1	14	1	2	1	9		0	1	1	1	63	0
19	83	1	1	8	1	8	1	2	1	9		0	0	0	1	13	1
98	80	1	1	0	1	0	1	3	2	9		0	1	0	2	91	0
98	80	1	0	6	0	38	1	3	1	9		0	0	0	4	75	1
98	81	0	0	1	0	5	1	3	1	9		0	0	0	3	56	0
98	91	1	0	1	1	15	1	3	1	9		0	0	0	4	61	1
78	85	1	0	9	0	34	1	3	1	9		0	1	1	2	57	0
69	86	1	1	2	1	47	1	3	1	9		0	0	0	1	63	1
66	87	0	0	2	0	17	1	3	1	9		0	0	0	2	50	1
98	80	1	0	7	0	10	1	4	1	9		1	0	0	3	77	1
98	81	1	0	3	0	10	1	4	1	9		0	0	0	3	78	1
98	83	1	1	6	1	6	1	4	1	9		0	0	0	2	76	0
92	87	1	0	1	0	3	1	4	1	9		0	0	0	2	45	1
55	91	0	1	16	1	16	1	4	1	9		1	1	0	1	62	1
25	80	1	0	18	1	30	1	4	1	9		1	1	0	2	71	0
39	82	0	0	5	0	20	1	5	1	9		0	0	0	1	64	1
38	85	1	0	4	1	28	1	5	1	9		0	0	0	1	49	1
34	82	1	0	1	0	28	1	6	1	9		0	0	0	1	52	0
30	80	1	1	1	1	4	1	7	1	9		0	0	0	0	68	0
28	98	0	0	7	1	14	1	7	1	9		0	0	0	1	50	0
9	83	1	0	5	1	33	1	7	1	9		0	0	0	2	65	1
11	83	1	0	24	1	33	1	7	1	9		0	1	0	2	53	1
98	85	0	0	3	1	16	1	9	1	9		0	0	0	2	64	1
83	89	1	0	9	0	24	1	9	1	9		0	0	0	1	50	0
17	80	1	1	1	1	4	1	9	1	9		0	0	0	0	112	0
12	80	1	1	8	1	8	1	9	1	9		0	1	0	2	65	1
98	81	1	0	2	0	29	3	1	1	3		0	0	0	3	48	0
98	87	1	0	3	0	8	3	1	2	10		0	0	0	3	64	0
98	85	1	0	1	0	9	3	1	2	10		0	0	0	2	77	1
80	83	1	1	2	1	6	3	1	2	10		0	1	0	2	74	1
65	80	1	0	3	0	31	3	1	2	10		0	0	0	2	75	1
9	92	1	0	2	0	5	3	1	2	10		0	0	0	2	82	0
98	88	0	1	13	1	17	3	1	1	10		0	0	0	2	58	0
91	80	1	0	1	0	9	3	1	1	10		0	0	0	2	48	1
80	83	1	0	32	1	37	3	1	1	10		0	0	0	1	49	0
65	87	1	1	6	1	7	3	1	1	10		0	0	0	1	62	0
21	87	1	0	1	0	4	3	1	1	10		0	1	0	2	46	1
17	80	1	0	1	0	7	3	1	1	10		0	0	0	1	46
1	83	1	1	2	1	3	3	1	1	10		0	1	0	1	93	1
2	80	1	1	10	1	15	3	1	1	10		0	1	1	2	94	1
3	83	1	0	2	1	58	3	1	1	10		0	0	0	2	63	1
3	84	0	1	5	1	7	3	1	1	10		0	1	0	1	84	1
98	90	0	0	2	0	6	1	2	2	10		0	0	0	2	64	1
98	91	0	0	1	0	10	1	2	2	10		0	0	0	3	66	1
98	91	1	0	1	0	2	1	2	2	10		0	1	0	3	68	1
98	92	1	0	1	0	1	1	2	2	10		0	1	0	3	86	0
98	86	1	1	1	1	1	1	2	2	10		0	1	0	4	101	1
98	84	1	0	28	1	1	1	2	2	10		0	1	0	2	107	1
98	82	1	1	5	1	5	1	2	2	10		1	1	0	4	102	1
98	90	1	0	2	1	4	1	2	2	10		0	0	0	3	64	1
98	89	1	0	1	1	11	1	2	2	10		0	0	0	3	47	0
93	84	1	0	5	1	33	1	2	2	10		1	1	0	2	79	0
53	83	1	0	2	1	17	1	2	2	10		0	0	0	2	70	0
44	93	1	0	3	0	17	1	2	2	10		0	0	0	2	70	1
98	80	1	0	6	0	21	1	2	1	10		0	1	0	2	48	0
98	84	0	0	1	0	4	1	2	1	10		0	1	0	2	67	0
98	97	1	0	2	0	27	1	2	1	10		0	1	0	3	72	0
98	89	1	0	4	0	29	1	2	1	10		0	1	0	5	65	0
98	81	1	0	2	0	8	1	2	1	10		0	0	0	5	66	1
98	88	1	1	7	1	6	1	2	1	10		1	0	0	3	76	1
98	92	0	1	0	1	0	1	2	1	10		0	1	0	3	96	0
90	92	1	0	23	0	36	1	2	1	10		0	1	1	2	75	1
90	86	0	0	27	0	42	1	2	1	10		1	1	0	2	67	0
92	93	1	1	9	1	10	1	2	1	10		0	1	0	2	78	1
66	93	0	0	1	0	12	1	2	1	10		0	0	0	1	52	0
66	90	1	0	3	0	50	1	2	1	10		0	0	0	1	50	0
66	84	1	1	11	1	11	1	2	1	10		0	0	0	2	55	1
55	91	0	0	3	0	18	1	2	1	10		0	0	0	1	48	0
55	80	1	1	1	1	19	1	2	1	10		0	1	0	1	83	1
51	89	1	0	28	0	62	1	2	1	10		1	0	0	2	60	1
46	84	0	0	3	0	7	1	2	1	10		0	1	0	1	60	1
47	84	0	0	1	0	7	1	2	1	10		0	0	0	1	57	1
44	81	0	1	1	1	1	1	2	1	10		0	1	0	2	87	1
37	93	0	1	15	1	16	1	2	1	10		0	1	1	2	55	1
34	85	1	0	7	0	51	1	2	1	10		0	0	0	2	61	0
25	85	0	0	2	0	8	1	2	1	10		0	0	0	2	55	1
27	87	1	0	5	0	16	1	2	1	10		0	0	0	2	58	1
28	85	0	0	4	0	9	1	2	1	10		0	0	0	2	64	1
28	83	1	0	1	0	8	1	2	1	10		0	0	0	1	55	1
28	94	0	0	3	0	3	1	2	1	10		0	0	0	1	60	1
25	92	0	1	4	1	4	1	2	1	10		1	0	0	1	59	1
19	92	0	0	1	0	8	1	2	1	10		0	1	0	0	34	1
19	88	1	0	1	0	13	1	2	1	10		1	0	0	0	26	1
19	88	1	0	2	0	5	1	2	1	10		0	0	0	2	96	1
19	89	1	1	2	1	11	1	2	1	10		0	0	0	2	28	1
17	80	1	0	5	0	8	1	2	1	10		0	1	0	2	54	0
17	81	0	0	6	0	15	1	2	1	10		1	0	0	1	70	0
17	85	1	0	2	1	4	1	2	1	10		1	1	1	1	85	0
13	85	0	0	1	0	1	1	2	1	10		0	0	0	1	58	0
8	87	1	0	3	1	15	1	2	1	10		0	0	0	2	61	1
11	82	0	1	2	1	2	1	2	1	10		0	1	0	2	61	1
98	82	1	0	6	0	12	1	3	2	10		0	0	0	2	67	0
98	83	0	0	5	0	10	1	3	2	10		0	0	0	4	63	0
98	84	0	0	1	0	4	1	3	2	10		0	0	0	4	63	1
98	82	0	0	4	0	10	1	3	2	10		0	0	0	4	66	1
19	84	1	0	2	1	29	1	3	2	10		0	0	0	0	44	1
98	85	1	0	0	0	0	1	3	1	10		0	0	0	5	60	1
98	83	0	0	1	0	2	1	3	1	10		0	0	0	3	56	1
98	80	1	1	9	1	9	1	3	1	10		0	0	0	3	111	1
98	86	0	1	1	1	1	1	3	1	10		0	0	0	4	73	0
91	92	0	1	2	1	7	1	3	1	10		0	1	0	1	64	1
51	85	0	0	3	0	4	1	3	1	10		0	0	0	2	50	0
26	85	1	0	3	0	3	1	3	1	10		0	0	0	1	52	0
18	80	0	0	1	0	10	1	3	1	10		0	0	0	2	53	0
17	80	1	0	2	0	18	1	3	1	10		1	0	0	2	57	0
10	88	0	0	2	1	19	1	3	1	10		0	0	0	0	60	0
98	81	1	0	1	0	6	1	4	2	10		0	0	0	2	68	1
98	84	0	0	1	0	3	1	4	2	10		0	0	0	3	70	1
98	81	0	0	0	0	4	1	4	2	10		1	0	0	2	64	1
98	80	1	0	5	1	64	1	4	2	10		0	0	0	4	76	0
98	89	1	1	0	1	3	1	4	2	10		0	0	0	3	68	1
89	82	0	1	1	1	1	1	4	2	10		0	1	0	2	80	0
20	97	0	0	1	1	13	1	4	2	10		0	0	0	2	61	0
98	85	0	0	1	0	5	1	4	1	10		0	0	0	3	66	1
98	81	0	1	1	1	1	1	4	1	10		0	0	0	2	75	1
98	86	0	1	2	1	19	1	4	1	10		1	0	0	3	83	0
98	81	0	1	12	1	12	1	4	1	10		1	0	1	2	75	1
98	80	0	0	4	1	14	1	4	1	10		0	0	0	2	71	0
97	81	1	1	1	1	10	1	4	1	10		0	0	0	2	70	1
19	85	0	0	2	0	13	1	4	1	10		1	0	0	1	39	1
19	86	0	1	7	1	18	1	4	1	10		0	0	0	1	40	1
4	95	0	1	10	1	21	1	4	1	10		0	1	0	1	71	0
98	87	0	0	2	0	28	1	5	2	10		0	0	0	3	58	1
98	80	1	0	0	1	1	1	5	2	10		0	0	0	2	60	1
98	80	1	0	5	1	6	1	5	1	10		0	0	0	2	70	1
98	83	1	0	4	0	6	1	5	1	10		0	0	0	2	60	1
91	82	1	0	7	0	10	1	5	1	10		0	0	0	2	49	1
55	85	0	1	5	1	5	1	5	1	10		0	0	0	1	49	1
48	88	0	1	6	1	6	1	5	1	10		0	0	0	2	50	0
24	85	0	0	3	0	4	1	5	1	10		0	0	0	2	59	0
58	86	1	0	6	0	7	1	5	1	10		0	0	0	2	49	1
18	85	0	0	48	0	268	1	5	1	10		0	1	0	2	64	0
13	80	1	0	2	0	4	1	5	1	10		0	0	0	2	58	0
13	92	0	1	4	1	4	1	5	1	10		1	1	0	2	59	1
34	89	1	0	1	1	7	1	6	1	10		0	0	0	2	52	1
3	83	0	0	2	1	18	1	6	1	10		0	0	0	1	51	0
83	85	0	0	1	0	3	1	7	2	10		0	0	0	2	58	0
54	83	1	0	7	0	23	1	7	2	10		0	0	0	2	58	1
44	93	1	0	3	1	53	1	7	2	10		0	0	0	2	58	1
34	86	0	0	3	1	9	1	7	2	10		0	0	0	2	65	0
28	85	1	1	7	1	10	1	7	2	10		1	1	0	2	67	1
12	86	1	0	2	0	4	1	7	2	10		0	0	0	2	69	1
91	82	1	0	10	0	13	1	7	1	10		0	1	0	2	55	0
66	85	1	0	7	0	48	1	7	1	10		0	0	0	1	53	0
61	82	1	0	2	0	6	1	7	1	10		0	0	0	1	58	0
52	81	0	0	7	0	27	1	7	1	10		0	0	0	2	54	1
44	93	1	0	2	0	8	1	7	1	10		0	0	0	2	56	1
34	95	0	0	3	0	4	1	7	1	10		0	0	0	1	61	0
21	101	0	0	2	0	6	1	7	1	10		0	0	0	2	55	1
21	85	0	0	7	0	10	1	7	1	10		0	0	0	0	34	1
17	81	1	0	2	0	12	1	7	1	10		0	0	0	1	50	0
8	92	1	0	2	0	8	1	7	1	10		0	0	0	2	62	1
12	91	0	0	6	1	50	1	7	1	10		0	0	0	2	60	1
1	83	1	0	1	1	58	1	7	1	10		0	0	0	2	59	1
98	89	1	0	3	0	6	1	9	2	10		0	0	0	3	68	0
98	82	1	0	1	1	12	1	9	2	10		0	0	0	4	64	1
98	80	0	1	18	1	18	1	9	2	10		0	0	0	3	81	1
98	84	1	1	1	1	1	1	9	2	10		0	1	0	2	75	0
93	93	1	1	4	1	19	1	9	2	10		0	1	0	2	108	1
66	82	0	1	7	1	7	1	9	2	10		0	0	0	2	64	0
61	82	1	1	5	1	16	1	9	2	10		0	1	0	2	104	1
31	83	1	0	5	1	11	1	9	2	10		1	0	0	2	79	1
30	83	0	0	6	0	22	1	9	2	10		0	0	0	0	65	1
19	82	1	0	1	0	10	1	9	2	10		0	0	0	1	49	1
98	88	0	1	0	1	0	1	9	1	10		0	1	0	2	65	1
91	86	0	0	6	0	20	1	9	1	10		0	0	0	1	47	0
90	92	1	1	4	1	5	1	9	1	10		0	0	0	2	68	1
82	85	1	0	2	0	5	1	9	1	10		0	0	0	1	53	1
66	85	0	0	5	0	23	1	9	1	10		1	0	0	1	50	0
65	89	0	0	1	0	49	1	9	1	10		0	0	0	1	52	1
54	85	0	0	3	0	3	1	9	1	10		0	0	0	2	62	1
48	87	0	0	1	0	4	1	9	1	10		0	0	0	2	54	1
46	87	0	0	8	1	51	1	9	1	10		0	0	0	2	47	1
34	86	0	0	2	0	16	1	9	1	10		0	0	0	2	50	1
30	86	0	0	1	0	1	1	9	1	10		0	0	0	0	55	0
25	98	0	0	5	0	11	1	9	1	10		0	0	0	2	54	1
20	82	1	0	4	1	10	1	9	1	10		0	0	0	1	67	0
19	88	1	0	6	0	11	1	9	1	10		1	1	0	1	31	1
19	93	0	1	2	1	2	1	9	1	10		0	0	0	2	71	0
15	85	0	0	12	0	34	1	9	1	10		0	1	0	2	96	1
98	82	1	0	1	1	4	3	1	2	11		0	0	0	2	78	1
65	81	0	0	1	0	7	3	1	2	11		0	0	0	2	66	1
1	81	1	0	2	1	6	3	1	2	11		0	0	0	2	99	1
98	80	1	0	1	0	2	3	1	1	11		0	0	0	3	65	1
98	83	0	1	4	1	4	3	1	1	11		1	1	0	2	79	1
98	95	0	0	1	0	10	3	1	1	11		0	0	0	5	52	1
98	84	0	0	8	0	42	3	1	1	11		0	0	0	2	51	1
98	85	0	0	1	0	4	3	1	1	11		0	0	0	3	57	0
98	83	1	1	5	1	5	3	1	1	11		1	0	0	6	66	0
91	90	0	0	2	0	19	3	1	1	11		0	0	0	1	49	1
15	81	1	0	1	0	4	3	1	1	11		0	0	0	2	71	0
1	86	0	1	3	1	17	3	1	1	11		1	1	0	2	88	1
98	89	1	0	1	0	7	1	2	2	11		0	0	0	4	54	1
98	81	1	0	1	1	4	1	2	2	11		0	1	0	2	89	1
98	81	1	0	1	0	10	1	2	2	11		0	1	0	2	62	0
98	86	0	0	13	0	13	1	2	2	11		0	0	0	2	71	1
98	87	0	1	2	1	2	1	2	2	11		0	0	0	2	78	1
85	89	0	0	4	0	29	1	2	2	11		1	0	0	2	82	1
53	87	0	0	4	1	23	1	2	2	11		0	0	0	2	63	1
45	89	0	1	5	1	37	1	2	2	11		0	0	0	2	89	1
36	88	1	1	7	1	7	1	2	2	11		0	0	0	2	94	1
35	88	1	1	2	1	7	1	2	2	11		1	0	0	2	95	1
34	85	0	1	6	1	6	1	2	2	11		0	1	1	2	98	1
28	88	0	0	5	1	24	1	2	2	11		1	0	0	2	67	1
19	82	1	0	1	0	4	1	2	2	11		0	0	0	1	49	1
19	88	0	0	3	1	5	1	2	2	11		0	1	0	1	47	1
18	82	0	0	1	0	11	1	2	2	11		0	0	0	2	77	1
18	90	0	0	10	1	14	1	2	2	11		0	1	0	2	79	1
15	83	1	1	2	1	2	1	2	2	11		0	1	0	2	95	1
12	82	1	0	3	0	5	1	2	2	11		0	0	0	2	65	1
12	92	0	1	11	1	11	1	2	2	11		0	1	0	2	90	1
98	85	1	0	3	0	11	1	2	1	11		0	0	0	2	81	1
98	83	1	1	9	1	9	1	2	1	11		0	0	0	4	77	0
98	88	0	0	3	0	15	1	2	1	11		0	0	0	2	82	1
98	80	0	0	2	0	13	1	2	1	11		0	0	0	3	65	0
98	84	0	0	#NULL!	1	31	1	2	1	11		0	1	0	3	74	1
98	83	0	0	8	1	14	1	2	1	11		0	0	0	2	75	0
98	81	0	0	4	1	7	1	2	1	11		0	0	0	3	68	1
95	90	0	0	3	0	26	1	2	1	11		0	0	0	2	62	1
95	83	1	1	2	1	2	1	2	1	11		0	1	1	2	89	0
82	85	0	0	2	0	7	1	2	1	11		0	0	0	2	62	1
82	92	1	0	3	1	10	1	2	1	11		0	0	0	1	78	1
78	85	1	0	9	1	76	1	2	1	11		0	0	1	2	58	1
75	92	1	0	5	1	32	1	2	1	11		0	1	0	2	81	0
67	80	1	0	6	1	43	1	2	1	11		0	1	0	1	84	0
59	89	1	0	23	1	82	1	2	1	11		1	1	0	1	71	1
46	92	0	0	3	0	7	1	2	1	11		0	0	0	2	65	1
46	86	0	1	3	1	22	1	2	1	11		1	0	0	2	68	1
36	86	0	0	10	0	19	1	2	1	11		0	0	0	1	66	0
34	83	0	0	4	0	9	1	2	1	11		0	0	0	1	59	1
28	83	1	0	2	0	8	1	2	1	11		0	0	0	1	63	1
28	81	1	0	33	1	154	1	2	1	11		1	1	0	2	59	0
22	84	0	1	3	1	3	1	2	1	11		0	0	0	1	34	0
21	80	1	0	2	0	16	1	2	1	11		0	0	0	2	39	0
19	84	1	0	1	0	4	1	2	1	11		1	1	0	2	58	1
19	90	1	0	17	1	20	1	2	1	11		0	1	1	1	30	1
19	86	1	1	6	1	6	1	2	1	11		1	0	0	0	34	1
17	85	1	0	2	0	6	1	2	1	11		0	0	0	1	53	0
9	85	1	0	5	0	19	1	2	1	11		0	0	0	2	79	0
11	81	1	0	6	0	17	1	2	1	11		0	0	0	2	72	1
11	81	1	1	9	1	9	1	2	1	11		0	1	1	1	85	0
12	80	1	0	4	1	7	1	2	1	11		1	0	0	2	67	1
1	81	0	1	5	1	26	1	2	1	11		0	1	0	2	79	1
98	83	1	0	3	0	3	1	3	2	11		0	0	0	3	48	0
83	81	0	0	6	0	6	1	3	2	11		0	0	0	2	58	0
78	87	0	1	18	1	20	1	3	2	11		0	1	1	2	72	1
44	89	0	0	32	1	37	1	3	2	11		0	1	1	2	70	1
34	80	0	0	4	0	44	1	3	2	11		0	0	0	2	79	1
1	91	0	1	8	1	8	1	3	2	11		0	0	0	2	91	1
98	85	1	1	1	1	1	1	3	1	11		0	1	0	4	101	1
98	85	1	1	1	1	1	1	3	1	11		0	1	0	4	98	1
52	84	1	0	3	0	11	1	3	1	11		0	0	1	2	58	1
19	85	0	0	2	0	6	1	3	1	11		0	0	0	0	34	1
18	84	0	0	1	0	49	1	3	1	11		0	0	0	1	55	1
10	84	0	0	4	1	7	1	3	1	11		0	0	0	2	57	1
90	82	1	0	1	0	9	1	4	2	11		0	0	0	2	60	0
59	87	0	0	2	1	42	1	4	2	11		0	0	0	1	44	1
45	89	1	1	21	1	26	1	4	2	11		0	1	0	2	83	1
46	89	1	0	5	1	26	1	4	2	11		0	1	0	2	65	1
26	83	1	0	6	0	48	1	4	2	11		0	0	0	2	60	1
27	84	1	0	5	0	48	1	4	2	11		0	0	0	2	63	1
24	88	0	1	1	1	24	1	4	2	11		0	0	0	2	80	1
28	84	0	0	2	1	8	1	4	2	11		0	0	0	2	60	0
9	80	0	1	4	1	6	1	4	2	11		1	0	0	2	78	1
92	80	1	0	1	0	1	1	4	1	11		0	0	0	2	53	1
85	85	1	0	1	0	38	1	4	1	11		1	0	0	2	59	0
53	84	1	0	1	0	10	1	4	1	11		1	0	0	1	65	1
98	82	1	0	3	0	23	1	5	2	11		0	0	0	4	48	0
98	80	1	0	3	1	3	1	5	2	11		0	0	0	6	75	1
82	81	1	0	12	0	52	1	5	2	11		0	0	0	2	64	1
78	87	1	0	4	0	7	1	5	2	11		0	0	0	2	65	1
34	80	0	0	3	1	11	1	5	2	11		0	0	0	2	62	0
24	91	0	0	3	0	14	1	5	2	11		0	0	0	2	54	1
19	81	0	0	2	0	15	1	5	2	11		0	0	0	2	61	1
98	83	1	0	1	0	11	1	5	1	11		0	0	0	3	80	0
91	81	0	0	11	0	11	1	5	1	11		0	0	0	2	81	0
53	93	0	0	1	0	46	1	5	1	11		0	0	0	2	50	1
21	84	1	0	2	0	28	1	5	1	11		0	0	0	1	30	0
21	81	1	0	6	1	20	1	5	1	11		0	0	0	1	58	0
19	86	1	0	1	0	11	1	5	1	11		0	1	0	1	20	0
12	92	1	1	6	1	6	1	5	1	11		1	1	0	1	65	1
72	86	1	0	2	0	9	1	6	2	11		0	0	0	0	64
34	84	0	0	5	0	19	1	6	2	11		0	0	0	2	58	1
34	84	0	0	4	0	7	1	6	2	11		0	0	0	2	58	0
34	85	0	1	5	1	5	1	6	2	11		0	0	0	2	64	1
46	92	0	0	7	0	9	1	6	1	11		0	0	0	2	62	1
19	80	0	0	3	1	24	1	6	1	11		1	0	0	0	24	1
12	87	0	0	3	0	8	1	6	1	11		0	0	0	2	63	1
2	92	0	1	4	1	4	1	6	1	11		0	0	0	2	73	1
83	85	0	1	5	1	5	1	7	2	11		0	0	0	2	63	0
82	81	1	0	5	0	83	1	7	2	11		0	0	0	2	58	1
53	81	0	1	6	1	7	1	7	2	11		1	0	0	2	65	1
51	84	0	0	2	0	6	1	7	2	11		0	0	0	2	58	1
31	91	0	1	4	1	4	1	7	2	11		1	0	0	2	80	1
25	83	0	0	5	0	8	1	7	2	11		0	0	0	2	61	0
27	80	1	0	5	0	10	1	7	2	11		0	0	0	2	63	0
11	80	1	0	4	0	11	1	7	2	11		0	0	0	2	60	0
91	80	1	0	12	0	13	1	7	1	11		0	0	0	2	59	0
93	80	1	0	1	0	5	1	7	1	11		0	0	0	2	65	1
91	81	0	1	1	1	5	1	7	1	11		0	1	0	2	91	0
78	87	0	0	6	1	8	1	7	1	11		0	0	0	1	77	1
78	86	0	1	4	1	4	1	7	1	11		0	1	0	2	68	1
78	87	0	1	2	1	2	1	7	1	11		0	0	0	1	61	1
55	93	0	0	1	0	4	1	7	1	11		0	0	0	2	50	0
51	83	0	0	8	0	13	1	7	1	11		0	0	0	1	59	0
39	83	1	0	2	0	7	1	7	1	11		0	0	0	2	80	0
25	88	0	0	1	0	10	1	7	1	11		0	0	0	1	58	0
18	85	0	0	1	0	11	1	7	1	11		1	0	0	1	59	0
9	82	0	0	5	0	10	1	7	1	11		0	0	0	2	71	0
8	86	1	0	1	1	9	1	7	1	11		0	0	0	2	72	1
11	81	0	1	16	1	16	1	7	1	11		0	0	0	2	72	0
2	82	1	1	1	1	1	1	7	1	11		0	1	0	1	111	1
66	81	1	0	1	0	7	1	9	2	11		0	0	0	2	63	0
38	86	1	0	6	0	60	1	9	2	11		0	0	0	2	60	0
38	88	0	0	15	1	54	1	9	2	11		0	0	0	2	68	0
87	85	1	1	1	1	1	1	9	1	11		0	1	0	2	56	0
36	87	1	0	3	1	7	1	9	1	11		0	0	0	2	57	0
30	86	0	0	1	1	5	1	9	1	11		0	0	0	0	59	1
25	82	0	1	4	1	4	1	9	1	11		0	0	0	1	77	0
18	83	0	0	1	0	5	1	9	1	11		0	0	0	2	64	1
10	82	1	0	1	1	5	1	9	1	11		0	0	0	2	68	0
98	82	0	0	3	0	3	3	1	2	12		0	0	0	6	51	1
98	88	0	1	6	1	6	1	4	2	12		1	1	0	2	81	0
98	80	0	0	2	1	11	1	5	1	12		0	1	0	2	74	0
98	86	0	0	15	0	46	3	1	2	13		0	0	0	2	64	0
98	86	0	0	1	0	9	3	1	2	13		0	0	0	4	57	1
98	82	0	0	2	0	9	3	1	2	13		0	0	0	2	62	1
95	80	0	0	10	0	25	3	1	2	13		0	1	0	2	76	0
93	81	0	1	11	1	13	3	1	2	13		1	1	1	2	74	1
74	86	0	1	8	1	10	3	1	2	13		0	1	0	2	95	1
29	82	0	0	3	0	8	3	1	2	13		0	0	0	2	54	0
29	85	0	0	1	0	7	3	1	2	13		0	0	0	2	57	1
19	94	0	0	2	1	68	3	1	2	13		0	1	1	2	66	1
17	80	0	0	1	0	4	3	1	2	13		0	0	0	2	54
3	85	0	0	9	0	38	3	1	2	13		0	1	0	2	80	1
95	80	0	0	2	0	5	3	1	1	13		0	0	0	2	46	0
95	86	0	0	2	0	17	3	1	1	13		0	0	0	1	67	0
91	88	0	0	5	0	148	3	1	1	13		0	0	0	1	45	1
92	87	0	0	10	0	15	3	1	1	13		0	1	0	2	53	0
75	81	0	0	5	1	28	3	1	1	13		0	0	0	1	51	1
23	83	0	0	2	0	60	3	1	1	13		0	0	0	2	63	1
21	90	0	0	7	0	101	3	1	1	13		1	0	0	2	64	0
19	89	0	0	1	0	33	3	1	1	13		0	0	0	0	49	1
19	81	0	0	6	0	25	3	1	1	13		1	1	0	1	19	1
15	80	0	0	1	0	8	3	1	1	13		0	0	0	2	71	0
4	93	0	0	2	0	21	3	1	1	13		0	0	0	1	46	1
4	89	0	0	5	0	8	3	1	1	13		1	0	0	2	73	0
98	80	0	0	3	0	7	1	2	2	13		0	0	0	2	75	1
98	81	0	1	4	1	4	1	2	2	13		0	1	1	4	84	1
98	84	0	0	6	1	8	1	2	2	13		0	0	0	2	65	1
98	81	0	0	5	1	12	1	2	2	13		0	0	0	3	76	1
98	88	0	1	1	1	3	1	2	2	13		1	0	0	4	48	1
95	80	0	0	3	1	13	1	2	2	13		0	0	0	2	73	0
92	84	0	0	5	1	25	1	2	2	13		1	0	0	2	74	0
83	90	0	0	8	0	8	1	2	2	13		0	0	0	2	62	0
83	82	0	1	14	1	14	1	2	2	13		0	0	0	2	65	1
83	84	0	0	11	1	40	1	2	2	13		0	0	0	2	65	1
82	87	0	0	7	0	11	1	2	2	13		0	0	0	2	63	0
74	81	0	1	1	1	12	1	2	2	13		0	1	0	2	99	0
72	87	0	0	3	0	11	1	2	2	13		0	0	0	2	68
61	88	0	1	25	1	25	1	2	2	13		0	0	0	2	79	1
48	87	0	1	4	1	4	1	2	2	13		0	1	0	2	61	0
46	82	0	1	7	1	7	1	2	2	13		0	0	0	2	62	1
36	86	0	0	2	0	40	1	2	2	13		0	0	0	2	58	0
36	80	0	0	5	0	9	1	2	2	13		1	0	0	2	67	0
34	93	0	0	1	0	44	1	2	2	13		0	0	0	2	58	1
34	85	0	0	4	1	82	1	2	2	13		0	0	0	2	67	0
26	87	0	0	2	0	4	1	2	2	13		0	0	0	2	65	0
27	86	0	0	22	0	73	1	2	2	13		1	1	1	2	72	1
28	92	0	0	4	0	20	1	2	2	13		1	0	0	2	64	1
28	91	0	0	2	0	6	1	2	2	13		0	0	0	2	61	0
26	87	0	1	7	1	8	1	2	2	13		1	0	0	2	63	1
29	81	0	0	18	1	63	1	2	2	13		0	0	0	2	75	1
56	80	0	0	7	0	9	1	2	2	13		1	0	0	2	58	0
21	91	1	0	20	1	37	1	2	2	13		1	0	0	1	35	1
19	87	0	0	33	0	49	1	2	2	13		1	1	0	2	41	1
18	86	0	0	3	0	33	1	2	2	13		0	1	0	2	98	0
18	89	0	1	2	1	3	1	2	2	13		0	0	0	2	77	1
17	81	0	1	2	1	2	1	2	2	13		0	0	0	2	109	0
8	84	0	0	3	0	8	1	2	2	13		0	0	0	2	74	1
9	87	0	0	5	0	15	1	2	2	13		1	0	0	2	66	1
12	80	0	0	1	0	8	1	2	2	13		0	0	0	2	62	1
9	85	0	1	3	1	4	1	2	2	13		0	1	0	2	76	1
12	83	0	1	7	1	7	1	2	2	13		0	0	0	2	75	1
12	84	0	0	6	1	16	1	2	2	13		0	0	0	2	61	1
98	82	0	0	2	0	5	1	2	1	13		0	1	0	2	75	0
98	91	0	0	2	0	7	1	2	1	13		0	1	0	2	79	1
98	93	0	0	2	0	5	1	2	1	13		0	0	0	4	70	0
98	83	0	1	0	1	0	1	2	1	13		0	1	0	3	108	1
98	81	0	1	7	1	7	1	2	1	13		1	1	0	2	68	0
98	90	0	0	6	1	14	1	2	1	13		0	1	0	5	72	1
97	81	0	0	9	0	12	1	2	1	13		0	0	0	1	50	0
96	86	0	1	20	1	20	1	2	1	13		0	1	1	2	77	0
95	85	0	0	9	0	14	1	2	1	13		0	1	0	2	65	0
95	82	0	1	2	1	2	1	2	1	13		0	1	0	2	84	0
95	80	0	1	8	1	8	1	2	1	13		0	1	1	2	91	0
90	90	0	0	3	0	16	1	2	1	13		0	0	0	2	61	0
91	85	0	0	4	0	10	1	2	1	13		0	0	0	2	62	0
92	89	0	0	5	0	8	1	2	1	13		0	1	0	2	64	1
93	84	0	0	2	0	5	1	2	1	13		0	0	0	1	55	0
93	88	0	0	10	1	63	1	2	1	13		0	0	0	2	64	1
85	85	0	0	20	0	27	1	2	1	13		1	1	0	1	63	1
86	85	0	0	1	0	14	1	2	1	13		0	1	0	2	62	1
82	92	0	0	15	0	31	1	2	1	13		1	0	0	1	67	0
82	104	0	0	9	0	11	1	2	1	13		1	0	0	2	62	1
82	92	0	0	8	0	73	1	2	1	13		0	0	0	1	63	1
82	88	0	0	11	0	128	1	2	1	13		0	0	0	2	57	1
82	92	0	1	25	1	25	1	2	1	13		0	0	0	1	62	1
77	82	0	0	2	0	7	1	2	1	13		0	0	0	2	58	0
77	85	0	0	2	0	10	1	2	1	13		0	0	0	2	57	0
77	91	0	0	3	0	19	1	2	1	13		1	0	0	1	74	0
77	93	0	0	4	1	22	1	2	1	13		1	0	0	2	68	0
75	85	0	1	1	1	1	1	2	1	13		0	1	0	2	85	0
71	83	0	0	1	0	42	1	2	1	13		0	0	0	0	64
72	83	0	0	1	0	42	1	2	1	13		1	0	0	0	65
72	91	0	0	3	0	5	1	2	1	13		0	0	0	2	50
71	83	0	0	2	1	45	1	2	1	13		0	0	0	1	60
72	87	0	1	4	1	11	1	2	1	13		0	0	0	2	66
66	86	1	0	2	0	24	1	2	1	13		0	0	0	2	55	1
66	84	0	0	6	0	10	1	2	1	13		1	0	0	2	55	0
64	89	0	0	13	0	16	1	2	1	13		0	0	0	2	68	1
61	85	0	0	2	0	9	1	2	1	13		0	0	0	2	58	0
55	87	0	0	4	0	17	1	2	1	13		0	0	0	2	71	1
55	91	0	0	2	0	4	1	2	1	13		0	0	0	1	60	0
55	89	0	1	3	1	3	1	2	1	13		0	0	0	2	98	1
52	80	1	0	3	0	11	1	2	1	13		0	0	0	1	54	1
54	81	0	0	10	0	25	1	2	1	13		1	0	0	1	62	0
54	83	0	0	4	0	4	1	2	1	13		0	0	0	2	58	0
51	83	0	0	15	0	27	1	2	1	13		0	0	0	2	55	1
51	80	0	1	20	1	22	1	2	1	13		0	1	0	2	66	1
48	97	0	1	14	1	16	1	2	1	13		1	1	0	2	64	0
48	80	0	0	7	0	13	1	2	1	13		0	0	0	2	45	0
48	86	0	0	6	0	12	1	2	1	13		0	0	0	2	54	1
48	92	0	0	9	0	62	1	2	1	13		0	0	0	2	59	1
48	83	0	0	11	0	17	1	2	1	13		1	0	0	2	64	1
48	90	0	1	3	1	3	1	2	1	13		0	0	1	2	70	0
48	94	0	1	5	1	5	1	2	1	13		1	0	0	2	68	1
44	88	0	0	5	0	40	1	2	1	13		0	0	0	2	54	1
47	90	0	0	8	0	11	1	2	1	13		0	0	0	1	55	1
37	89	0	0	1	0	5	1	2	1	13		0	0	0	2	55	0
38	89	0	0	11	0	15	1	2	1	13		1	0	0	2	61	1
36	88	0	0	6	0	17	1	2	1	13		0	0	0	2	64	0
36	88	0	0	10	0	34	1	2	1	13		1	0	0	1	68	0
36	87	0	0	4	0	10	1	2	1	13		0	0	0	2	50	0
36	85	0	1	20	1	56	1	2	1	13		0	1	1	2	64	1
35	80	0	1	1	1	1	1	2	1	13		0	0	0	2	94	1
35	87	0	1	9	1	16	1	2	1	13		1	0	0	2	87	1
35	90	0	0	3	1	13	1	2	1	13		1	0	0	2	71	1
35	86	0	1	6	1	6	1	2	1	13		0	0	1	2	98	1
34	83	0	0	4	0	10	1	2	1	13		0	0	0	2	60	0
34	95	0	0	2	0	15	1	2	1	13		0	0	0	2	54	0
31	81	0	0	2	0	8	1	2	1	13		1	0	0	2	55	1
31	80	0	0	3	0	6	1	2	1	13		0	0	0	2	60	1
30	88	0	0	1	0	6	1	2	1	13		0	0	0	0	55	0
30	85	0	0	1	0	3	1	2	1	13		0	0	0	0	50	1
30	85	0	0	9	0	14	1	2	1	13		1	0	0	0	61	0
30	82	0	0	2	1	43	1	2	1	13		0	0	0	0	57	1
30	92	0	0	3	1	15	1	2	1	13		1	0	0	0	59	1
30	97	0	0	13	1	103	1	2	1	13		1	0	0	0	60	1
25	87	0	0	18	0	89	1	2	1	13	2	1	0	0	2	55	1
27	90	0	0	4	0	9	1	2	1	13	99	0	0	0	2	58	1
24	89	0	0	1	0	4	1	2	1	13		0	0	0	2	65	1
25	82	0	0	4	0	27	1	2	1	13		1	0	0	0	64	0
25	85	0	0	14	0	21	1	2	1	13		1	1	0	1	90	0
25	92	0	0	2	0	5	1	2	1	13		0	0	0	2	55	0
25	92	1	0	18	0	85	1	2	1	13		1	1	1	2	80	1
26	89	0	0	3	0	25	1	2	1	13		0	0	0	1	50	1
26	85	0	0	8	0	8	1	2	1	13		0	0	0	1	62	0
26	86	0	0	19	0	47	1	2	1	13		0	0	0	2	50	1
26	89	0	0	5	0	25	1	2	1	13		1	0	0	1	62	0
26	81	0	0	1	0	18	1	2	1	13		0	0	0	2	55	0
26	87	0	0	1	0	11	1	2	1	13		1	0	0	2	55	1
26	86	0	0	3	0	12	1	2	1	13		0	0	0	1	50	0
27	86	0	0	3	0	6	1	2	1	13		0	0	0	2	55	1
27	92	0	0	1	0	3	1	2	1	13		0	0	0	2	57	1
28	80	0	0	8	0	14	1	2	1	13		1	0	0	1	55	0
28	90	0	0	1	0	9	1	2	1	13		1	0	0	2	62	0
28	97	0	0	2	0	9	1	2	1	13		1	0	0	1	57	0
28	80	0	0	3	0	8	1	2	1	13		0	0	0	1	60	1
28	85	0	0	3	0	5	1	2	1	13		0	0	0	2	61	0
28	100	0	0	6	0	36	1	2	1	13		0	0	0	2	58	0
28	88	0	0	15	0	22	1	2	1	13		1	1	0	1	92	1
28	80	0	0	18	0	207	1	2	1	13		1	1	0	2	91	1
28	92	1	0	3	0	85	1	2	1	13		1	0	0	2	62	1
29	82	0	0	2	0	27	1	2	1	13		0	0	0	1	61	0
25	86	0	1	8	1	23	1	2	1	13		1	1	1	1	75	0
25	90	0	1	3	1	3	1	2	1	13		0	0	0	2	73	1
25	87	0	1	5	1	5	1	2	1	13		0	1	0	2	84	0
25	90	0	1	1	1	1	1	2	1	13		1	1	0	2	67	1
25	100	0	1	3	1	3	1	2	1	13		0	0	0	2	57	1
26	101	0	0	17	1	27	1	2	1	13		1	1	0	2	74	1
27	96	0	1	11	1	11	1	2	1	13		1	1	0	1	82	0
23	86	0	0	1	0	265	1	2	1	13		0	0	0	2	57	1
56	94	0	0	4	0	28	1	2	1	13		1	0	0	2	54	1
56	88	0	0	6	0	7	1	2	1	13		1	0	0	1	62	0
57	89	0	0	2	0	27	1	2	1	13		0	0	0	1	52	0
58	80	0	1	4	1	4	1	2	1	13		1	1	1	2	77	1
21	93	0	0	1	0	5	1	2	1	13		0	0	0	1	45	0
21	88	0	0	3	0	13	1	2	1	13		0	0	0	1	59	1
21	81	0	1	3	1	24	1	2	1	13		0	1	1	2	59	0
21	86	0	0	8	1	32	1	2	1	13		1	1	0	2	61	1
21	94	0	0	4	1	22	1	2	1	13		0	1	0	1	40	1
19	85	0	0	1	0	8	1	2	1	13		0	0	0	2	61	1
19	82	0	0	3	0	7	1	2	1	13		1	0	0	2	76	1
19	85	0	0	1	0	14	1	2	1	13		1	1	1	1	45	1
19	80	0	0	1	0	2	1	2	1	13		0	1	0	0	56	1
19	86	0	0	2	0	11	1	2	1	13		1	0	0	1	17	1
19	81	0	0	1	0	3	1	2	1	13		0	0	0	2	43	1
19	96	0	0	1	0	3	1	2	1	13		0	0	0	1	37	1
19	96	0	0	1	0	16	1	2	1	13		0	0	0	0	45	1
19	80	0	0	1	0	12	1	2	1	13		0	1	0	1	67	0
19	94	0	0	3	0	17	1	2	1	13		0	0	0	1	28	1
19	93	0	1	8	1	56	1	2	1	13		1	1	0	1	93	1
19	91	0	0	1	1	16	1	2	1	13		0	0	0	1	24	1
19	84	0	1	2	1	2	1	2	1	13		1	1	1	0	55	0
19	86	0	0	8	1	50	1	2	1	13		1	1	1	1	8	1
18	85	0	0	1	0	8	1	2	1	13		1	0	0	2	60	1
18	85	0	0	2	0	12	1	2	1	13		0	0	0	2	59	1
18	89	0	0	11	0	23	1	2	1	13		1	1	0	2	72	1
18	102	0	0	2	0	20	1	2	1	13		1	0	0	1	53	1
18	96	0	0	3	1	6	1	2	1	13		1	0	0	2	69	1
15	99	0	0	18	0	74	1	2	1	13		1	1	0	1	86	1
15	92	0	0	1	0	36	1	2	1	13		0	0	0	2	66	1
15	82	0	1	21	1	21	1	2	1	13		0	1	0	2	87	1
15	85	0	1	14	1	16	1	2	1	13		0	1	1	2	73	1
15	87	0	1	28	1	28	1	2	1	13		1	1	0	2	83	0
8	89	0	0	5	0	14	1	2	1	13		0	0	0	2	67	0
8	90	0	0	25	0	40	1	2	1	13		1	1	1	2	75	1
9	86	0	0	5	0	16	1	2	1	13		0	1	0	1	58	1
10	85	0	0	10	0	30	1	2	1	13		0	0	0	1	57	0
10	83	0	0	4	0	11	1	2	1	13		0	0	0	1	62	1
10	92	1	0	2	0	12	1	2	1	13		0	0	0	2	61	1
10	87	0	0	4	0	12	1	2	1	13		0	0	0	2	60	1
10	86	0	0	2	0	6	1	2	1	13		0	0	0	2	67	1
11	83	0	0	3	0	14	1	2	1	13		0	0	0	2	57	1
12	83	0	0	1	0	8	1	2	1	13		0	0	0	1	50	0
12	85	0	0	4	0	7	1	2	1	13		0	0	0	2	64	1
12	90	0	0	3	0	7	1	2	1	13		1	0	0	2	50	0
14	85	0	0	2	0	15	1	2	1	13		0	0	0	1	59	1
14	87	0	0	2	0	4	1	2	1	13		0	0	0	2	63	1
8	81	0	0	9	1	74	1	2	1	13		0	1	1	2	81	1
8	88	0	1	8	1	12	1	2	1	13		0	0	0	2	58	1
9	81	0	0	1	1	74	1	2	1	13		0	1	1	2	79	1
9	86	0	1	1	1	2	1	2	1	13		0	0	0	2	74	1
9	88	0	1	6	1	11	1	2	1	13		0	0	1	2	80	1
10	87	0	0	2	1	6	1	2	1	13		0	0	0	1	60	1
10	87	0	0	13	1	34	1	2	1	13		0	0	0	2	57	1
4	81	0	0	1	0	11	1	2	1	13		1	0	0	2	64	1
4	91	0	1	1	1	2	1	2	1	13		0	1	0	0	87	1
1	83	0	0	17	0	68	1	2	1	13		0	0	0	1	93	1
1	84	0	1	4	1	6	1	2	1	13		0	1	1	2	108	1
1	87	0	0	8	1	26	1	2	1	13		0	0	0	2	60	0
98	83	0	0	1	0	2	1	3	2	13		0	0	0	2	48	1
98	83	0	0	0	0	12	1	3	2	13		0	0	0	2	85	0
98	84	0	0	3	0	8	1	3	2	13		0	1	0	2	71	0
98	83	0	0	1	0	34	1	3	2	13		0	0	0	2	63	0
98	83	0	0	2	0	14	1	3	2	13		0	0	0	5	71	1
98	88	0	0	9	1	64	1	3	2	13		0	1	0	3	62	1
98	91	0	0	1	1	67	1	3	2	13		0	0	0	2	60	1
98	91	0	0	4	1	4	1	3	2	13		0	0	0	2	74	1
85	81	0	0	1	0	3	1	3	2	13		0	0	0	2	60	0
71	87	0	0	8	0	11	1	3	2	13		0	0	0	2	62
55	95	0	0	1	1	9	1	3	2	13		0	0	0	2	60	1
34	89	0	0	2	0	3	1	3	2	13		0	0	0	2	60	1
34	80	0	0	8	0	13	1	3	2	13		0	0	0	2	63	0
24	87	0	0	4	0	73	1	3	2	13		1	0	1	2	88	1
25	89	0	0	1	0	8	1	3	2	13		0	0	0	2	58	0
27	81	0	1	43	1	63	1	3	2	13		0	1	1	2	66	1
56	81	0	0	5	0	13	1	3	2	13		0	0	0	2	63	1
98	83	0	0	2	0	5	1	3	1	13		0	0	0	3	61	0
98	86	0	0	1	0	9	1	3	1	13		0	0	0	2	68	0
98	91	0	0	6	0	9	1	3	1	13		0	0	0	4	68	1
98	83	0	0	2	0	4	1	3	1	13		0	0	0	3	51	1
98	80	0	0	6	0	12	1	3	1	13		0	0	0	2	60	0
98	80	0	1	1	1	1	1	3	1	13		0	1	0	3	63	0
95	81	0	0	4	0	19	1	3	1	13		0	1	0	2	56	0
95	85	0	0	3	1	41	1	3	1	13		0	0	0	1	52	1
90	87	0	0	4	0	8	1	3	1	13		0	0	0	2	52	0
90	83	0	0	5	0	10	1	3	1	13		0	0	0	1	54	0
90	84	0	0	2	0	8	1	3	1	13		0	1	0	2	56	1
90	81	0	0	20	0	40	1	3	1	13		1	1	0	1	58	0
91	86	0	0	8	0	16	1	3	1	13		0	0	0	1	52	1
91	80	0	0	1	0	15	1	3	1	13		0	0	0	2	63	1
86	85	0	1	1	1	1	1	3	1	13		0	1	0	2	77	1
82	83	0	0	2	0	2	1	3	1	13		0	0	0	1	53	1
82	90	0	0	3	0	7	1	3	1	13		0	0	0	2	49	1
82	87	0	0	7	0	33	1	3	1	13		0	0	0	1	56	1
82	80	0	0	1	0	1	1	3	1	13		0	0	0	2	53	1
78	87	0	0	1	1	31	1	3	1	13		0	0	0	2	78	0
71	80	0	0	2	0	23	1	3	1	13		0	0	0	2	64
71	87	0	0	1	0	2	1	3	1	13		0	0	0	1	50
66	83	0	0	2	0	9	1	3	1	13		1	0	0	2	50	0
66	83	0	1	1	1	1	1	3	1	13		1	0	0	2	64	0
64	84	0	0	2	0	8	1	3	1	13		0	0	0	1	50	1
64	87	0	0	1	0	2	1	3	1	13		0	0	0	2	53	1
64	83	0	0	25	0	45	1	3	1	13		0	1	0	2	68	1
55	91	0	0	2	0	15	1	3	1	13		0	0	0	2	55	0
55	84	0	0	5	0	16	1	3	1	13		0	0	0	2	50	0
55	95	0	0	2	0	4	1	3	1	13		0	0	0	2	45	1
55	92	0	0	6	0	12	1	3	1	13		0	0	0	2	50	0
55	85	0	0	3	0	4	1	3	1	13		0	0	0	2	52	0
55	86	1	1	37	1	43	1	3	1	13		1	1	1	2	76	0
52	87	0	0	2	0	47	1	3	1	13		0	0	0	2	57	1
52	96	0	0	4	1	39	1	3	1	13		1	0	0	1	57	0
51	84	0	0	11	0	16	1	3	1	13		1	0	0	2	69	1
48	84	0	0	5	0	11	1	3	1	13		0	1	0	2	50	0
48	92	0	0	3	0	4	1	3	1	13		0	0	0	2	45	0
48	86	0	1	22	1	23	1	3	1	13		1	1	0	2	45	0
37	93	0	1	2	1	2	1	3	1	13		1	1	1	2	72	0
31	87	0	0	2	0	5	1	3	1	13		1	0	0	2	50	1
25	86	0	0	1	0	6	1	3	1	13		0	0	0	1	45	1
25	95	0	0	1	0	49	1	3	1	13		0	0	0	1	45	1
25	80	0	0	4	0	45	1	3	1	13		0	0	0	2	52	0
25	92	0	0	3	0	27	1	3	1	13		0	0	0	1	45	0
26	88	0	0	4	0	9	1	3	1	13		0	0	0	2	60	0
26	87	0	0	2	0	3	1	3	1	13		0	0	0	2	45	1
26	90	0	0	5	0	12	1	3	1	13		0	0	0	2	60	1
27	89	0	0	8	0	51	1	3	1	13		0	1	0	1	89	0
27	91	0	0	3	0	7	1	3	1	13		0	0	0	2	50	1
28	82	0	0	7	0	13	1	3	1	13		1	0	0	2	60	0
28	85	0	0	3	0	6	1	3	1	13		0	0	0	1	50	0
28	89	0	0	10	0	51	1	3	1	13		0	0	0	1	50	0
27	93	0	1	3	1	3	1	3	1	13		0	1	1	1	77	0
27	91	0	1	14	1	14	1	3	1	13		1	1	1	2	55	1
58	87	0	0	1	0	3	1	3	1	13		0	0	0	1	42	0
22	80	0	0	1	0	8	1	3	1	13		0	0	0	1	48	0
21	85	0	0	3	0	6	1	3	1	13		1	0	0	2	55	1
21	92	0	0	1	0	6	1	3	1	13		0	0	0	1	53	0
21	87	0	0	3	0	15	1	3	1	13		0	0	0	1	47	1
21	90	0	0	3	0	8	1	3	1	13		0	1	1	2	63	1
19	87	0	0	4	0	6	1	3	1	13		0	0	0	1	21	1
19	87	0	0	1	0	10	1	3	1	13		1	0	0	1	10	1
19	89	0	0	2	0	9	1	3	1	13		1	0	1	1	13	1
19	87	0	0	1	0	3	1	3	1	13		0	1	0	2	33	1
19	92	0	0	2	1	83	1	3	1	13		0	1	0	0	81	1
18	83	0	0	3	0	7	1	3	1	13		0	1	0	1	66	0
18	82	0	0	3	0	10	1	3	1	13		0	0	0	2	50	1
18	90	0	0	2	0	26	1	3	1	13		1	0	0	1	50	1
18	80	0	0	9	0	11	1	3	1	13		1	0	0	2	49	1
18	82	0	0	1	0	3	1	3	1	13		0	0	0	2	52	0
17	80	0	0	10	0	10	1	3	1	13		1	0	0	1	53	0
15	86	0	0	2	1	8	1	3	1	13		0	0	0	2	64	1
12	86	0	0	2	0	13	1	3	1	13		0	0	0	2	56	1
8	87	0	1	3	1	13	1	3	1	13		1	0	0	2	54	1
[truncated: 2,605 more rows]
